1 **Title: Plasmodesmal connectivity in C<sub>4</sub> *Gynandropsis gynandra* is induced by light**  
2 **and dependent on photosynthesis**

3  
4  
5 **Authors:**

6 Tina B. Schreier<sup>1,\*</sup>, Karin H. Müller<sup>2</sup>, Simona Eicke<sup>3</sup>, Christine Faulkner<sup>4</sup>, Samuel C.  
7 Zeeman<sup>3</sup> and Julian M. Hibberd<sup>1,\*</sup>

8  
9 **Affiliations:**

10 <sup>1</sup> Department of Plant Sciences, University of Cambridge, Downing Street, CB1 3EA  
11 Cambridge, United Kingdom

12 <sup>2</sup> Cambridge Advanced Imaging Centre (CAIC), University of Cambridge, Downing Street,  
13 CB2 3DY Cambridge, United Kingdom

14 <sup>3</sup> Institute of Molecular Plant Biology, ETH Zurich, CH-8092 Zurich, Switzerland

15 <sup>4</sup> Cell and Developmental Biology, John Innes Centre, Norwich Research Park, Norwich  
16 NR4 7UH, United Kingdom

17  
18 \* Correspondence: [tbs32@cam.ac.uk](mailto:tbs32@cam.ac.uk), [jmh65@cam.ac.uk](mailto:jmh65@cam.ac.uk)

19  
20  
21 **Running title: Light-induced plasmodesmata formation**

22  
23 **Keywords:** Plasmodesmata, photosynthesis, C<sub>4</sub> photosynthesis, light,  
24 photomorphogenesis, bundle sheath, mesophyll

25  
26  
27 **SUMMARY (200 words)**

28 **INTRODUCTION (722 words)**

29 **MATERIALS AND METHODS (1304 words)**

30 **RESULTS (1831 words)**

31 **Figures 1-6, all Figures should be published in colour**

32 **Supporting information: Figures 1-5, Videos 1-3.**

33 **DISCUSSION (1315 words)**

34  
35 **Total (5379 words)**

36 **SUMMARY**

- 37
- 38 • In leaves of C<sub>4</sub> plants the reactions of photosynthesis become restricted between two  
39 compartments. Typically, this allows accumulation of C<sub>4</sub> acids in mesophyll cells to  
40 drive their diffusion into the bundle sheath. In C<sub>4</sub> monocotyledonous grasses  
41 proliferation of plasmodesmata between these cell types is thought to increase cell-  
42 to-cell connectivity to allow efficient metabolite movement. However, it is not clear if  
43 C<sub>4</sub> dicotyledons also show enhanced plasmodesmal connectivity between these cell  
44 types and whether this is a general requirement for C<sub>4</sub> photosynthesis is not known.  
45 How mesophyll and bundle sheath cells in C<sub>4</sub> leaves become highly connected is  
46 also not known.
  - 47 • We investigated these questions using 3D- and 2D- electron microscopy on the C<sub>4</sub>  
48 dicotyledon *Gynandropsis gynandra*, and phylogenetically close C<sub>3</sub> relatives.
  - 49 • The mesophyll-bundle sheath interface of C<sub>4</sub> *G. gynandra* showed higher  
50 plasmodesmal frequency compared with closely related C<sub>3</sub> species. Formation of  
51 these plasmodesmata was induced by light. Pharmacological agents that perturbed  
52 chloroplast development or photosynthesis reduced the number of plasmodesmata,  
53 but this inhibitory effect could be reversed by the provision of exogenous sucrose.
  - 54 • We conclude that the enhanced plasmodesmata formation between mesophyll and  
55 bundle sheath cells of C<sub>4</sub> *G. gynandra* appears to be wired to the induction of C<sub>4</sub>  
56 photosynthesis.  
57  
58  
59

## 60 INTRODUCTION

61 C<sub>4</sub> photosynthesis represents a carbon concentration mechanism that evolved  
62 independently over 60 times from the ancestral C<sub>3</sub>-type of photosynthesis (Sage et al.  
63 (2011)). In leaves of C<sub>4</sub> plants, HCO<sub>3</sub><sup>-</sup> is initially fixed by Phosphoenolpyruvate Carboxylase  
64 (PEPC) in mesophyll (M) cells into a 4-carbon acid (malate/aspartate), which is transferred  
65 to bundle sheath (BS) cells for decarboxylation to produce pyruvate and CO<sub>2</sub>. Pyruvate is  
66 transferred back to the mesophyll cells, where it is reduced to phosphoenolpyruvate that can  
67 accept another CO<sub>2</sub> molecule. This spatial separation of carboxylation and decarboxylation  
68 between mesophyll and bundle sheath cells builds a high concentration of CO<sub>2</sub> in bundle  
69 sheath cells and in so doing limits the oxygenation side reaction of RuBisCO (Hatch, 1987).  
70 This greatly increases photosynthesis efficiency, particularly in hot and dry environments.

71 An efficient exchange of metabolites between mesophyll and bundle sheath cells is  
72 therefore crucial to the C<sub>4</sub> pathway and as a consequence compared with the ancestral C<sub>3</sub>  
73 condition C<sub>4</sub> leaves are typically reconfiguration in terms of both biochemical pathways and  
74 anatomy. Most C<sub>4</sub> plants have Kranz anatomy - with closely spaced veins and a wreath-like,  
75 concentric arrangement of enlarged bundle sheath cells that are directly adjacent to  
76 mesophyll cells, maximizing mesophyll-bundle sheath contact sites (Sedelnikova et al.,  
77 2018). Kranz anatomy is associated with increased cell-to-cell connectivity between the  
78 mesophyll and bundle sheath cells to allow the efficient exchange of metabolites. Metabolite  
79 exchange between the two cell types is proposed to occur via passive diffusion through  
80 plasmodesmata, down a steep concentration gradient of C<sub>4</sub> metabolites (Hatch, 1987).  
81 Plasmodesmata are regulated channels between adjacent plant cells and diverse in  
82 structure: from simple (with single openings in adjacent cells) to complex (highly branched  
83 with central cavities), or even asymmetric in their organisation (Ross-Elliott et al., 2017;  
84 Faulkner, 2018). Plasmodesmata contain several structural components including a narrow  
85 tube of endoplasmic reticulum called the desmotubule, the cytoplasmic sleeve and the  
86 plasma membrane (Faulkner, 2018). Plasmodesmata are considered essential for cell-to-  
87 cell transport of metabolites in many C<sub>4</sub> grasses because suberized bundle sheath cell walls  
88 likely reduce CO<sub>2</sub> leakage by blocking apoplastic metabolite transfer (Hatch and Osmond,  
89 1976). Furthermore, C<sub>4</sub> grasses possess increased numbers of plasmodesmata at the  
90 mesophyll – bundle sheath cell interface (Evert et al., 1977; Botha et al., 1992; Danila et al.,  
91 2016). As plasmodesmata occur in clusters (pitfields), increased cell-to-cell connectivity in  
92 C<sub>4</sub> leaves can be a result of increased pit field area or increased numbers of plasmodesmata  
93 per pit field area. Danila et al. (2016) observed up to 9-fold increase in plasmodesmal  
94 frequency at the mesophyll-bundle sheath interface in C<sub>4</sub> maize and *Setaria viridis*

95 compared with the C<sub>3</sub> species rice and wheat. This increase in the C<sub>4</sub> grasses was due to a  
96 2-fold increase in plasmodesmata numbers per pitfield, and a 5-fold increase in pitfield area.  
97 In other C<sub>4</sub> grass species substantial variation in absolute plasmodesmata frequency was  
98 evident but they all possessed greater plasmodesmata frequency than C<sub>3</sub> species (Danila  
99 et al., 2018).

100 To our knowledge, the distribution of plasmodesmata at the mesophyll-bundle sheath cell  
101 interface between C<sub>3</sub> and C<sub>4</sub> species has not been studied outside the grasses. Further, the  
102 cues that underpin increased plasmodesmata formation are not known. Given the known  
103 variation in how increased cell-to-cell connectivity is achieved in C<sub>4</sub> grasses and the fact that  
104 they evolved C<sub>4</sub> photosynthesis independently from C<sub>4</sub> dicotyledenous lineages, we  
105 assessed plasmodesmata distribution in leaves of C<sub>3</sub> *Tarenaya hassleriana* and C<sub>4</sub>  
106 *Gynandropsis gynandra* that both belong to the *Cleomaceae* (Brown et al., 2005; Marshall  
107 et al., 2007) which is sister to the *Brassicaceae*. *G. gynandra* has been developed as a C<sub>4</sub>  
108 model (Brown et al., 2005; Marshall et al., 2007; Koteyeva et al., 2011). We discovered that  
109 plasmodesmal frequency is up to 8-fold higher at the mesophyll-bundle sheath cell interface  
110 in mature leaves of C<sub>4</sub> *G. gynandra* compared with that in C<sub>3</sub> species. Moreover, these  
111 increased numbers of plasmodesmata are rapidly established during de-etiolation.  
112 Pharmacological studies using multiple chloroplast inhibitors demonstrated that light,  
113 functional chloroplasts and photosynthesis are required to initiate plasmodesmata formation  
114 at mesophyll-bundle sheath cell interface of *G. gynandra*. Provision of exogenous sucrose  
115 can rescue defects in chloroplasts and photosynthesis. We conclude that increased cell-to-  
116 cell connectivity is likely an unifying feature of all two-celled C<sub>4</sub> plants, and that during the  
117 evolution of the C<sub>4</sub> pathway the increased formation of secondary plasmodesmata is  
118 induced by the induction of photosynthesis itself.

119



## 120 MATERIAL AND METHODS

### 121 Plant Material and growth conditions

122 *G. gynandra* and *T. hassleriana* seeds were germinated on wet filter papers in petri  
123 dishes. For *G. gynandra*, germination was initiated by exposing seeds to 30°C for 24 h. For  
124 *T. hassleriana*, germination was stimulated by an alternating temperature regime of 12 h  
125 32°C then 12 h at 20°C for 5 consecutive days. After germination, *G. gynandra* and *T.*  
126 *hassleriana* seedlings were planted in 10:1 ratio of M3 compost (Levington Advance, Pot  
127 and Bedding, High Nutrient):fine vermiculite in individual pots. *A. thaliana* (Col-0) was sown  
128 onto potting compost (Levington Advance, Solutions) with 0.17 g L<sup>-1</sup> insecticide (thiacloprid,  
129 Exemptor) and stratified for 48 h at 4°C. Around 2 weeks after germination, individual  
130 seedlings were transplanted to individual pots.

131 To sample of mature leaves, plants were grown in a climate-controlled growth chamber  
132 with 16-h light and 8-h dark. *G. gynandra* and *T. hassleriana* were grown at 350 μmol  
133 photons m<sup>-2</sup> s<sup>-1</sup> at 25°C with a 60% (v/v) relative humidity and ambient CO<sub>2</sub>. *A. thaliana*  
134 plants were grown under identical conditions except light intensity was 150 μmol photons  
135 m<sup>-2</sup> s<sup>-1</sup>. All plants were watered by an automated system whereby the bottom of the trays  
136 was flooded to a depth of 4 cm every 48 h for 10 min, after which the irrigation water was  
137 drained.

138 For deetiolation experiments, *G. gynandra* seeds were germinated with the addition of  
139 0.15% (v/v) plant preservative mixture (Apollo Scientific, CAS: 26172-55-4) to the wet filter  
140 paper. Germinated seedlings were transferred to square plates containing half-strength MS  
141 (Murashige and Skoog) salts with B5 vitamins (Duchefa Biochemie BV) and 0.8% (w/v) agar  
142 (Melford) in the dark. Plates were grown in the plant growth cabinet (Panasonic MLR-352  
143 PE) at 20 °C with continuous light intensity of 150 μmol m<sup>-2</sup> s<sup>-1</sup>. Plates were covered with  
144 aluminum foil for three consecutive days to ensure no light was able to penetrate. Aluminum  
145 foil was removed on day 3 and to allow de-etiolation plants grown for an additional 24 to 48  
146 h in the light. For sucrose supplementation, 10 g L<sup>-1</sup> sucrose was added to the half-strength  
147 MS media. For inhibitor treatments, 500 μM lincomycin (Sigma Aldrich), 50 μM norflurazon  
148 (Sigma Aldrich) and 20 μM DCMU (Sigma Aldrich) were added to the half-strength MS  
149 media before the media was poured in the individual petri dishes. As norflurazon and  
150 lincomycin were dissolved in ethanol, the control and DCMU treatments included an  
151 equivalent amount of ethanol in the media.

152

153

154

155 **Electron microscopy**

156 Samples from 5-8 individual seedlings at each time point were harvested for electron  
157 microscopy. Leaf segments (~2 mm<sup>2</sup>) were excised with a razor blade and immediately fixed  
158 in 2% (v/v) glutaraldehyde and 2% (w/v) formaldehyde in 0.05 - 0.1 M sodium cacodylate  
159 (NaCac) buffer (pH 7.4) containing 2 mM calcium chloride. Samples were vacuum infiltrated  
160 overnight, washed 5 times in 0.05 – 0.1 M NaCac buffer, and post-fixed in 1% (v/v) aqueous  
161 osmium tetroxide, 1.5% (w/v) potassium ferricyanide in 0.05 M NaCac buffer for 3 days at  
162 4°C. After osmication, samples were washed 5 times in deionized water and post-fixed in  
163 0.1% (w/v) thiocarbohydrazide for 20 min at room temperature in the dark. Samples were  
164 then washed 5 times in deionized water and osmicated for a second time for 1 h in 2% (v/v)  
165 aqueous osmium tetroxide at room temperature. Samples were washed 5 times in deionized  
166 water and subsequently stained in 2% (w/v) uranyl acetate in 0.05 M maleate buffer (pH 5.5)  
167 for 3 days at 4°C, and washed 5 times afterwards in deionized water. Samples were then  
168 dehydrated in an ethanol series, transferred to acetone, and then to acetonitrile. Leaf  
169 samples were embedded in Quetol 651 resin mix (TAAB Laboratories Equipment Ltd) and  
170 cured at 60°C for 2 days.

171

172 **Transmission electron microscopy (TEM) and Scanning electron microscopy (SEM)**

173 For TEM, ultra-thin sections were cut with a diamond knife using a Leica Ultracut microtome  
174 and collected on copper grids and examined in a FEI Tecnai G2 transmission electron  
175 microscope (200 keV, 20 µm objective aperture). Images were obtained with an AMT CCD  
176 camera. For SEM of plasmodesmata pitfields in *G. gynandra*, *T. hassleriana* and *A. thaliana*,  
177 samples were prepared according to Danila et al. (2018). In summary, mature leaves were  
178 cut into 10-20 mm strips and fixed in 2% (v/v) glutaraldehyde and 2% (w/v) formaldehyde in  
179 0.05 - 0.1 M sodium cacodylate (NaCac) buffer (pH 7.4) containing 2 mM calcium chloride  
180 under vacuum infiltration overnight at RT. Leaf tissue was dehydrated in an ethanol series  
181 and critical point dried (CPD) in a Quorum E3100 dryer. CPD leaf samples were ripped apart  
182 using forceps and sticky tape. Ripped samples were mounted on aluminum SEM stubs using  
183 conductive carbon tabs (TAAB), sputter-coated with a thin layer of iridium (15 nm) and  
184 imaged in a Verios 460 scanning electron microscope (FEI, Hillsboro, OR) run at an  
185 accelerating voltage of 2 keV and 25 pA probe current. Low magnification images were  
186 acquired with an Everhart-Thornley detector whilst high-resolution images were acquired  
187 using the through-lens detector in immersion mode.

188 For 2D SEM mapping, ultra-thin sections were placed on Melinex (TAAB Laboratories  
189 Equipment Ltd) plastic coverslips mounted on aluminum SEM stubs using conductive

190 carbon tabs (TAAB Laboratories Equipment Ltd), sputter-coated with a thin layer of carbon  
191 (~ 30 nm) to avoid charging and imaged in a Verios 460 scanning electron microscope at 4  
192 keV accelerating voltage and 0.2 nA probe current using the concentric backscatter detector  
193 in field-free (low magnification) or immersion (high magnification) mode (working distance  
194 3.5 – 4 mm, dwell time 3  $\mu$ s, 1536 x 1024 pixel resolution). For plasmodesmata frequency  
195 quantification, SEM stitched maps were acquired at 10,000X magnification using the FEI  
196 MAPS automated acquisition software. Greyscale contrast of the images were inverted to  
197 allow easier visualisation.

198 Serial block face scanning electron microscopy (SBF-SEM) was performed on Quetol 651  
199 resin-embedded mature leaf samples of *G. gynandra*, *T. hassleriana* and *A. thaliana* as  
200 described above. Overviews of leaf cross-sections and the zoomed stacks of the mesophyll  
201 – bundle sheath cell interface ( $\approx$ 300-400 images) were acquired through sequentially  
202 sectioning the block faces at 50 nm increments and imaging the resulting block-face by  
203 SEM. Images were acquired with a scanning electron microscope TFS Quanta 250 3VIEW  
204 (FEI, Hillsboro, OR) at 1.8-2 keV with an integrated 3VIEW stage and a backscattered  
205 electron detector (Gatan Inc., Pleasanton, CA, USA). Images were aligned and smoothed  
206 using the plugins MultiStackReg and 3D median filter on ImageJ.

207 Plasmodesmal frequency from 2D and 3D EM images was determined using published  
208 methods (Koteyeva et al., 2014; Botha, 1992). Briefly, plasmodesmal frequency was  
209 determined as the number of plasmodesmata observed per  $\mu$ m of length of shared cell  
210 interface between two cell types (mesophyll – bundle sheath, mesophyll – mesophyll, bundle  
211 sheath – bundle sheath). Plasmodesmata numbers and cell lengths were determined using  
212 ImageJ software. Plasmodesmata were defined as dark channels in the EM images.  
213 Depending on plasmodesmata orientation, the entire channel was sometimes not visible on  
214 2D EM images, and so only channels that spanned more than half of the cell wall width were  
215 counted.

216

## 217 **Chlorophyll fluorescence measurement**

218 Chlorophyll fluorescence measurements were carried out using a CF imager  
219 (Technologica Ltd, UK) and image processing software provided by the manufacturer.  
220 Seedlings were placed in the dark for 20 min evaluate dark-adapted minimum fluorescence  
221 ( $F_0$ ), dark-adapted maximum fluorescence ( $F_m$ ) and then variable fluorescence  $F_v$   
222 ( $F_v = F_m - F_0$ ). All chlorophyll fluorescence images of inhibitor-treated seedlings within each  
223 experiment were acquired at the same time in a single image, measuring a total of 8  
224 seedlings per treatment.

225

226 **Statistical analysis**

227 In violin plots, the middle line represents the median, the box and whiskers represent the  
228 25 to 75 percentile and minimum-maximum distributions of the data. Letters show the  
229 statistical ranking using a one-way ANOVA and post hoc Tukey test (different letters indicate  
230 differences at  $P < 0.05$ ). Values indicated by the same letter are not statistically different.  
231 Data was analyzed using RStudio 2022.07.2+576.

232 **RESULTS**

233 **Plasmodesmata frequency is higher in C<sub>4</sub> *G. gynandra* leaves compared with C<sub>3</sub> *A.***  
234 ***thaliana* and *T. hassleriana***

235 We first explored whether the increased plasmodesmal connectivity between mesophyll  
236 and bundle sheath cells found in C<sub>4</sub> grasses was also present in the C<sub>4</sub> dicotyledon  
237 *Gynandropsis gynandra*. Transmission electron microscopy was used to examine the  
238 mesophyll-bundle sheath cell interface in mature leaves of *G. gynandra* plants and the  
239 closely related C<sub>3</sub> species *Tarenaya hassleriana* (also a member of the *Cleomaceae*) and  
240 C<sub>3</sub> model *Arabidopsis thaliana*. Plasmodesmata were more abundant at mesophyll-bundle  
241 sheath interfaces in C<sub>4</sub> *G. gynandra* compared with both C<sub>3</sub> species (Fig. 1). The increased  
242 physical connectivity was specific to this interface, and no obvious increases were detected  
243 between the mesophyll-mesophyll or bundle sheath-bundle sheath cell interfaces in any of  
244 the species (Supporting Information Fig. S1).

245 To quantify plasmodesmata numbers between mesophyll-bundle sheath cells, we  
246 conducted serial block-face scanning electron microscopy (SBF-SEM). SBF-SEM offers  
247 excellent resolution in 3D and has previously been used to quantify plasmodesmata in other  
248 systems (Ross-Elliott et al., 2017; Paterlini and Belevich, 2022). Thin sections prepared from  
249 fully expanded true leaves of *G. gynandra*, *T. hassleriana* and *A. thaliana* were imaged and  
250 a mesophyll-bundle sheath cell interface area for serial block face sectioning was identified  
251 (Fig. 2a-c). From each species, between 281-438 serial transverse sections per mesophyll-  
252 bundle sheath cell interface were collected and compiled into videos (Supporting Information  
253 Videos S1-3). Using these SBF-SEM sections we quantified plasmodesmata frequency by  
254 determining the number of plasmodesmata per length of mesophyll-bundle sheath cell  
255 interface imaged in 3D (Fig. 2d). In C<sub>4</sub> *G. gynandra*, plasmodesmata were visible in almost  
256 every mesophyll-bundle sheath cell interface assessed such that only 20 out of 467  
257 contained no plasmodesmata at all (Fig. 2d). In contrast, in the two C<sub>3</sub> species  
258 plasmodesmata were not detected in the majority of interfaces (263/367 for *T. hassleriana*,  
259 628/886 for *A. thaliana*). Because plasmodesmata appear in clusters (pitfields) rather than  
260 being equally distributed, a wide range of plasmodesmal frequencies per section were  
261 observed between mesophyll and bundle sheath cells in all three species. However, there  
262 were more sections with higher frequencies observed at the mesophyll-bundle sheath  
263 interface of C<sub>4</sub> *G. gynandra*, and this resulted in a 13-fold increase in the mean frequency  
264 compared with C<sub>3</sub> *T. hassleriana* and C<sub>3</sub> *A. thaliana* (Fig. 2d). Plasmodesmal frequencies  
265 between mesophyll and bundle sheath cells of the C<sub>3</sub> species *T. hassleriana* and *A. thaliana*  
266 were not significantly different to each other and were low compared with C<sub>4</sub> *G. gynandra*.

267 SBF-SEM provides an excellent 3D view of plasmodesmata frequency and distribution  
268 but is relatively low throughput and so limited numbers of cell interfaces can be visualised  
269 per unit time. We therefore used 2D electron microscopy to further explore the high  
270 occurrence of plasmodesmata at the mesophyll-bundle sheath cell interface of C<sub>4</sub> *G.*  
271 *gynandra*. Large areas of leaf sections were imaged at high resolution using 2D Scanning  
272 Electron Microscopy (SEM) mapping such that automated serial imaging at 10,000X  
273 magnification and subsequent image stitching enabled visualization of plasmodesmata at  
274 numerous interfaces within the same 2D section (Fig. **3a**). Representative SEM maps in  
275 which cell interfaces (mesophyll-bundle sheath, mesophyll-mesophyll and bundle sheath-  
276 bundle sheath) were pseudocoloured according to their plasmodesmal frequency, and  
277 consistent with the 3D SBF-SEM analysis reported above, illustrated that plasmodesmata  
278 were specifically enriched at the mesophyll-bundle sheath interface of C<sub>4</sub> *G. gynandra*  
279 (indicated by the numerous green-coloured interfaces). In contrast, frequency was lower  
280 and more uniform between all cellular interfaces in C<sub>3</sub> species (indicated by the pink and  
281 orange pseudocoloured cell interfaces) (Fig. **3a**). Plasmodesmata frequencies were  
282 quantified from at least three SEM maps originating from three independent plants  
283 (biological replicates; 10-40 individual mesophyll – bundle sheath, mesophyll-mesophyll and  
284 bundle sheath-bundle sheath cell interfaces per biological replicate). This showed that  
285 plasmodesmata numbers between mesophyll and bundle sheath cells were more than 8-  
286 fold higher in C<sub>4</sub> *G. gynandra* compared with both C<sub>3</sub> species. The three cellular interfaces  
287 (mesophyll-bundle sheath, mesophyll-mesophyll and bundle sheath-bundle sheath) in both  
288 C<sub>3</sub> species had similar plasmodesmal frequencies. Interestingly, plasmodesmal frequency  
289 of all three types of cell interface in *G. gynandra* was significantly higher than that of the  
290 corresponding interface in each of the two C<sub>3</sub> species. The mesophyll-mesophyll and bundle  
291 sheath-bundle sheath interfaces were approximately 3-4-fold and 2-fold higher in C<sub>4</sub> *G.*  
292 *gynandra* compared with *T. hassleriana* and *A. thaliana* respectively, indicating that cell-to-  
293 cell connectivity is generally enhanced between photosynthetic cells of the C<sub>4</sub> species (Fig.  
294 **2b**). Plasmodesmata frequencies estimated from analysis of numerous mesophyll-bundle  
295 sheath cell interfaces using this 2D SEM mapping were not statistically different from the  
296 frequencies obtained from multiple serial sections of the mesophyll-bundle sheath interface  
297 using SBF-SEM (Supporting Information Fig. 2). To allow greater replication and sampling  
298 subsequent analysis was therefore carried out with the 2D SEM mapping technique.

299 To investigate the relationship between increased frequency of plasmodesmata at the  
300 mesophyll-bundle sheath interface and pit fields, we visualized pitfields using SEM by  
301 tearing critical point dried mature leaves as described in Danila et al. (2016). Pitfields were



302 clearly visible at the mesophyll-bundle sheath interface in all species, but unlike the previous  
303 work in grasses, individual plasmodesmata within the pitfields could not be distinguished  
304 (Supporting Information Fig. **3a**). When we measured the mean area of pitfields in each  
305 species there was no clear difference. This suggests that the increased plasmodesmata  
306 frequency at mesophyll-bundle sheath in *G. gynandra* most likely results from increased pit  
307 field numbers per cell interface rather than enlarged pit fields that contain more  
308 plasmodesmata (Supporting Information Fig. **3b**).

309

#### 310 **Increased plasmodesmal frequency between mesophyll and bundle sheath cells of** 311 **C<sub>4</sub> *G. gynandra* is established after exposure to light**

312 Induction of the photosynthetic apparatus associated with the C<sub>4</sub> pathway, such as  
313 chloroplast development and C<sub>4</sub> gene expression typically occurs rapidly in response to light  
314 (Shen et al., 2009; Singh et al., 2021). Such de-etiolation analysis is simplest if cotyledons  
315 can be analysed, and as cotyledons of *G. gynandra* have C<sub>4</sub> anatomy (Koteyeva et al., 2011)  
316 we examined plasmodesmata in cotyledons during de-etiolation. Cross sections of  
317 cotyledons showed that Kranz anatomy was already partially developed in 3-day-old dark  
318 grown seedlings (Fig. **4a**). For example, veins were closely spaced, and bundle sheath cells  
319 contained abundant organelles. However, after 24 h of light cotyledons had almost doubled  
320 in size and substantial cell expansion and formation of air spaces was evident (Fig. **4a**).  
321 High-resolution 2D SEM maps from cross sections of at least three cotyledons (biological  
322 replicates) of *G. gynandra* were obtained at 0 h, 24 h and 48 h after transfer to light.  
323 Surprisingly, in dark-grown seedlings plasmodesmal frequency at mesophyll-bundle sheath,  
324 mesophyll-mesophyll, and bundle sheath-bundle sheath were similar (n = 204) (Fig. **4c,d**).  
325 However, after light induction plasmodesmal frequency increased 1.7-fold after 24 h and  
326 2.5-fold after 48 h between mesophyll and bundle sheath cells of *G. gynandra* (Fig. **4b-d**).  
327 There was also a small increase in plasmodesmata numbers between mesophyll and  
328 mesophyll cells after light exposure. These responses were specific to de-etiolation because  
329 growth in the dark for 48 h did not increase plasmodesmata numbers (Supporting  
330 Information Fig. **4a-d**). These data indicate that as with true leaves, cotyledons of *G.*  
331 *gynandra* develop high plasmodesmal connectivity between mesophyll and bundle sheath  
332 cells, and that this takes place rapidly in response to light. We conclude that light is a crucial  
333 developmental cue for the formation of secondary plasmodesmata at the mesophyll-bundle  
334 sheath interface in the C<sub>4</sub> plant *G. gynandra*.

335



336 **Functional chloroplasts are required for light-induced formation of plasmodesmata**  
337 **between the mesophyll and bundle sheath**

338 De-etiolation involves the transition from skotomorphogenic to photomorphogenic growth  
339 whereby fully photosynthetic chloroplasts develop from etioplasts within hours of light  
340 exposure (Pipitone et al., 2021; Singh et al., 2021; Cackett et al., 2021). Therefore, it is  
341 possible that the increase in plasmodesmal connectivity at the mesophyll – bundle sheath  
342 interface during de-etiolation is either a direct response to light or is triggered by signals  
343 from the chloroplast or photosynthesis. To investigate this, we used inhibitors with distinct  
344 modes of action to perturb chloroplast function. Lincomycin and norflurazon block plastid  
345 translation and carotenoid biosynthesis respectively and so stop the development of  
346 chloroplasts from etioplasts (Mulo et al., 2003; Chamovitz et al., 1991); Fig. **5b**). DCMU [3-  
347 (3,4-dichlorophenyl)-1,1-dimethylurea] blocks the electron transport chain at Photosystem II  
348 (PSII) (Trebst, 2007) and thus inhibits photosynthesis directly. Seedlings were grown with  
349 and without each inhibitor and seedlings transferred to light for 48 h. Lincomycin- and  
350 DCMU-treated seedlings had pale yellow cotyledons indistinguishable from non-treated  
351 controls. Norflurazon treatment generated seedlings with white cotyledons, consistent with  
352 compromised carotenoid accumulation (Fig. **5a**). Etioplast ultrastructure was largely  
353 unaffected by the inhibitor treatments (Fig. **5b**). After 48 h of light, cotyledons of controls and  
354 DCMU-treated seedlings were green and etioplasts had developed into chloroplasts (Fig.  
355 **5a,b**). Norflurazon and lincomycin-treated seedlings had pale cotyledons even after light  
356 induction and their etioplast-to-chloroplast development was arrested (Fig. **5a,b**). To confirm  
357 that each inhibitor had the expected effect on chloroplast function we used chlorophyll  
358 fluorescence imaging to quantify  $F_v/F_m$  which provides a read-out for the maximum quantum  
359 efficiency of Photosystem II. Each of the inhibitors drastically reduced  $F_v/F_m$  compared with  
360 controls (Fig. **5c,d**). Norflurazon-treated seedlings were not visible on the chlorophyll  
361 fluorescence imager as chlorophyll content was too low.

362 Using 2D SEM maps we quantified plasmodesmal frequency by counting the number of  
363 plasmodesmata and measuring the length of shared cell wall. This was conducted for nearly  
364 1200 independent cell interfaces from each treatment (549 interfaces for the 0 h time point,  
365 649 interfaces for the 48 h time point). None of the three inhibitors affected plasmodesmal  
366 frequency at any cell interface in dark-grown seedlings (Fig. **5e-g**). However, despite  
367 cotyledon expansion being unaffected by the inhibitors during de-etiolation (Supporting  
368 Information Fig. **5a**) plasmodesmal frequencies did not increase significantly in seedlings  
369 treated with norflurazon, lincomycin or DCMU (Fig. **5e-g**, Supporting Information Fig. **5b**). In  
370 summary, inhibitors that perturbed the etioplast-to-chloroplast transition, or blocked

371 photosynthetic electron transport, reduced light-induced plasmodesmata formation at the  
372 mesophyll-bundle sheath cell interface of C<sub>4</sub> *G. gynandra*. We conclude that chloroplast  
373 function, and in particular photosynthetic electron transport, play an important role in  
374 controlling the formation of secondary plasmodesmata in the C<sub>4</sub> leaf.

375 The inhibitory effect of DCMU on plasmodesmata formation could be associated with  
376 signalling from a dysfunctional photosynthetic electron transport chain, or because less  
377 photosynthate is produced. To test the latter hypothesis plants were grown on sucrose  
378 during DCMU treatment. No distinguishable effects on phenotype of the seedlings or  
379 etioplast-to-chloroplast development were detected (Fig. **6a,b**) and provision of sucrose did  
380 not rescue the reduction in  $F_v/F_m$  caused by DCMU (Fig. **6c,d**). We quantified plasmodesmal  
381 frequencies in a total of 1655 cell interfaces (mesophyll-bundle sheath, mesophyll-  
382 mesophyll, bundle sheath-bundle sheath) among the different DCMU/sucrose treatments  
383 (Fig. **6e-g**). Strikingly, DCMU-treated seedlings supplemented with sucrose had  
384 plasmodesmal frequencies at the mesophyll-bundle sheath interface comparable to  
385 untreated seedlings (Fig. **6e**,  $p > 0.05$ ), indicating full rescue by sucrose of the DCMU-  
386 induced inhibition of plasmodesmata formation (Fig. **6e**). Thus, when photosynthetic  
387 electron transport is inhibited, sucrose is sufficient to restore plasmodesmata formation at  
388 the mesophyll-bundle sheath cell interface.

389

390 **DISCUSSION**

391 **Increased plasmodesmata frequency is a conserved C<sub>4</sub> trait**

392 A critical feature of C<sub>4</sub> photosynthesis is the spatial separation of biochemical processes  
393 such that CO<sub>2</sub> can be concentrated around RuBisCO. The consequence of this partitioning  
394 of photosynthetic reactions is an absolute requirement for the exchange of metabolites  
395 between cell types. In C<sub>4</sub> grasses this has long been associated with increased  
396 plasmodesmal frequency between mesophyll and bundle sheath cells (Evert et al., 1977).  
397 Despite the very different leaf morphology between monocotyledons and dicotyledons our  
398 results reveal that increased plasmodesmal connectivity between mesophyll-bundle sheath  
399 cells is likely a conserved trait among C<sub>4</sub> plants. Our findings are therefore consistent with  
400 increased plasmodesmal connectivity representing a unifying trait of all C<sub>4</sub> species that  
401 separate photosynthesis between two cell types. In *G. gynandra*, the mesophyll-bundle  
402 sheath interfaces had 8-13-fold higher plasmodesmata frequency than those of the closely  
403 related C<sub>3</sub> species *T. hassleriana* and *A. thaliana* (Fig. 1-3). This increase is comparable to  
404 plasmodesmata numbers and distributions reported for C<sub>4</sub> grasses (Botha et al., 1992;  
405 Danila et al., 2016). Danila et al. (2018) reported that C<sub>4</sub> grasses running the NAD-ME  
406 subtype of C<sub>4</sub> photosynthesis had the highest numbers of plasmodesmata between  
407 mesophyll and bundle sheath cells. As *G. gynandra* also primarily uses NAD-ME to  
408 decarboxylate CO<sub>2</sub> in the bundle sheath, broader analysis of C<sub>4</sub> dicotyledons is required to  
409 determine the extent to which plasmodesmal frequencies correlate with the various  
410 biochemical sub-types.

411 Plasmodesmal frequencies at the mesophyll-bundle sheath interface of *G. gynandra* are  
412 consistent with those reported previously in this species where no analysis of closely related  
413 C<sub>3</sub> plants were possible (Koteyeva et al., 2014). By quantifying plasmodesmata at all  
414 interface types and comparing plasmodesmal frequency with phylogenetically proximate C<sub>3</sub>  
415 plants we demonstrate that plasmodesmata numbers are generally higher at all three types  
416 of cell interface (mesophyll-bundle sheath, mesophyll-mesophyll, bundle sheath-bundle  
417 sheath) in C<sub>4</sub> *G. gynandra*. This is consistent with previous work that observed increased  
418 plasmodesmata frequencies between photosynthetic leaf cells in C<sub>4</sub> grasses compared to  
419 C<sub>3</sub> grasses (Danila et al., 2016).

420 A distinguishing feature of increased plasmodesmal frequency between the mesophyll  
421 and bundle sheath cells of *G. gynandra* compared with C<sub>4</sub> grasses, is that the increase in  
422 *G. gynandra* occurred without any detectable increase in pitfield area compared with C<sub>3</sub> *T.*  
423 *hassleriana* and C<sub>3</sub> *A. thaliana* (Supporting Information Fig. 2). This suggests that the  
424 primary mechanism for increased plasmodesmata numbers in *G. gynandra* is an increase

425 in pitfields. Since we were not able to visualise individual plasmodesmata within pitfields,  
426 we cannot rule out that there is a higher frequency of individual plasmodesmata number  
427 within pitfields in *G. gynandra*. However, this is unlikely since pitfield appearance was largely  
428 similar between *G. gynandra*, *T. hassleriana* and *A. thaliana* (Supporting Information Fig. 2).  
429 In contrast, increased plasmodesmal frequency in C<sub>4</sub> grasses was accompanied by  
430 increases in pitfield area such that were up to 5 times greater than those in C<sub>3</sub> species  
431 (Danila et al., 2016, 2018). This difference suggests that the mechanisms by which  
432 increased plasmodesmata numbers between mesophyll and bundle sheath cells can vary  
433 between C<sub>4</sub> lineages.

434 Flux of metabolites between cells is likely to be determined by plasmodesmata number  
435 as increased numbers can facilitate greater flux. However, bundle sheath cells are not air-  
436 tight and plasmodesmata could also contribute to CO<sub>2</sub> leakiness such that a proportion of  
437 the CO<sub>2</sub> concentrated in the bundle sheath diffuses back to the mesophyll. CO<sub>2</sub> leakiness  
438 particularly increases during photosynthetic induction in NADP-ME type C<sub>4</sub> plants such as  
439 sorghum and maize (Wang et al., 2022). Thus, it is possible that plasmodesmata number  
440 and distribution need to be optimised to allow maximum photosynthetic efficiency in C<sub>4</sub>  
441 plants. Being able to accurately quantify plasmodesmal traits in diverse C<sub>4</sub> species may be  
442 crucial to develop further understanding in this area, and in particular in modelling metabolite  
443 flux through the C<sub>4</sub> pathway (Danila et al., 2016; Von Caemmerer, 2021). These could  
444 incorporate recent models of metabolite diffusion through plasmodesmata, such as the  
445 geometric and narrow escape models (Denim et al., 2019; Hughes et al., 2021).

446

#### 447 **Light triggers rapid plasmodesmata formation in mostly pre-existing cell walls**

448 In C<sub>4</sub> grasses the developmental cue that enhances plasmodesmata formation between  
449 mesophyll and bundle sheath cells is not known. However, *Setaria viridis* and maize show  
450 some plasticity in plasmodesmal density in response to growth irradiance (Danila et al.,  
451 2019). Our data has further emphasized an important role for light and photosynthesis in  
452 establishing plasmodesmal frequency by showing that light rapidly triggers the formation of  
453 plasmodesmata at the mesophyll-bundle sheath interface in *G. gynandra*.

454 Plasmodesmata are either formed *de novo* during cell division by trapping ER strands  
455 between enlarging Golgi-derived vesicles in new cell walls (primary plasmodesmata) or  
456 formed into pre-existing cell walls (secondary plasmodesmata) (Hepler, 1982; Ehlers and  
457 Kollmann, 2001; Faulkner et al., 2008). We believe that the increase in plasmodesmata  
458 numbers between mesophyll and bundle sheath cell during dark to light transition is driven  
459 by the formation of secondary plasmodesmata. Firstly, cotyledon growth from dark to light

460 is thought to be exclusively driven by cell expansion and not cell division in Arabidopsis  
461 (Tsukaya et al., 1994; Stoyanova-Bakalova et al., 2004). Secondly, the basic structure of  
462 bundle sheath cells was already formed in dark grown seedlings, and the formation of  
463 plasmodesmata was rapid. Our SEM mapping technique provided sufficient resolution to  
464 observe branching in plasmodesmata (Fig. 2,4-6), but interestingly we did not observe any  
465 structural differences between the plasmodesmata in different cell interfaces. Although  
466 primary and secondary plasmodesmata can be sometimes distinguished by structure, where  
467 secondary plasmodesmata are more branched, this is highly dependent on other factors  
468 such as leaf age and sink-source transition (Roberts et al., 2001).

469

### 470 **A role for metabolism and organelles in formation of plasmodesmata**

471 Our results suggest that chloroplasts, and more specifically photosynthesis, fuel the  
472 formation of secondary plasmodesmata between mesophyll and bundle sheath cells in *C<sub>4</sub>*  
473 *G. gynandra*. Inhibition of photosynthesis and chloroplast development through the  
474 application of chemical inhibitors greatly reduced plasmodesmata formation during  
475 deetiolation but this effect could be rescued by the exogenous supply of sucrose (Fig. 5,6).  
476 Although to our knowledge, a role of photosynthate in controlling formation of  
477 plasmodesmata has not been proposed previously some findings are consistent with this  
478 hypothesis. For example, in rice constitutive overexpression of the *C<sub>4</sub>* maize *GOLDEN2-*  
479 *LIKE* transcription that controls chloroplast biogenesis (Waters et al., 2008) not only  
480 activated chloroplast and mitochondria development in bundle sheath cells but also  
481 increased plasmodesmata numbers between the mesophyll and bundle sheath as well as  
482 the bundle and mestome sheath (Wang et al., 2017). Moreover, in *A. thaliana* links between  
483 organelles and plasmodesmata have been reported. *A. thaliana* mutants with altered cell-  
484 to-cell connectivity and/or plasmodesmata structure such INCREASED SIZE EXCLUSION  
485 LIMIT1 and 2 (ISE1/ISE2) encode mitochondrial and chloroplast RNA helicases respectively  
486 (Kobayashi et al., 2007; Stonebloom et al., 2009), while the GFP ARRESTED  
487 TRAFFICKING1 (GAT1) locus encodes a chloroplast thioredoxin (Benitez-Alfonso et al.,  
488 2009). However, the mechanisms of how these organelle-localized proteins affect  
489 plasmodesmata formation are poorly understood. Retrograde signaling from chloroplast to  
490 nucleus has also been proposed to control plasmodesmata formation and regulation (Burch-  
491 Smith et al., 2011; Ganusova et al., 2020). The fact that exogenous supply of sucrose is  
492 sufficient to sustain plasmodesmata formation in the presence of DCMU (Fig. 6) strongly  
493 suggests a direct metabolic role of chloroplasts in plasmodesmata formation. This may  
494 involve sucrose/photosynthesis providing energy required for plasmodesmata formation, or

495 sucrose acting as a signalling molecule to trigger plasmodesmata formation via sugar  
496 signalling, and further work will be required to address how sugar controls plasmodesmata  
497 formation in *G. gynandra*. However, our work demonstrates that increased plasmodesmal  
498 connectivity is likely conserved trait found in both C<sub>4</sub> dicotyledons and monocotyledons.  
499 Moreover, the enhanced formation of plasmodesmata between mesophyll and bundle  
500 sheath cells of C<sub>4</sub> leaves is co-ordinated and dependent on photosynthesis. Evolution  
501 therefore appears to have wired the enhanced formation of plasmodesmata in C<sub>4</sub> leaves to  
502 the development of chloroplasts and ultimately the induction of photosynthesis.



503 **DATA AVAILABILITY**

504 The data supporting the findings of this study are available from the corresponding author  
505 upon request.

506

507

508 **ACKNOWLEDGEMENTS**

509 The work was funded by the Advanced European Research Council (grant 694733  
510 REVOLUTION to J.M.H.). T.B.S. was supported by the Swiss National Science Foundation  
511 (SNSF) Early Postdoc Mobility Fellowship (P2EZIP3\_181620), the SNSF Postdoc Mobility  
512 Fellowship (P500PB\_203128) and the EMBO Long-Term Fellowship (ALTF 531-2019). C.F.  
513 was funded by the European Research Council (grant 725459 INTERCELLAR to C.F.) and  
514 Biotechnology and Biological Research Council Institute Strategic Programme (Plant  
515 Health, BBS/E/J/000PR9796 to the John Innes Centre.). For the purpose of open access  
516 the authors have applied a Creative Commons Attribution (CC BY) licence to any Author  
517 Accepted Manuscript version arising from this submission. We thank Filomena Gallo and  
518 Lyn Carter from the Cambridge Advanced Imaging Centre for the electron microscopy  
519 sample preparation as well as the support during the image acquisition. We thank Miriam  
520 Lucas from Scope M at ETH Zurich for advice and assistance with SBF-SEM. We also thank  
521 for Zhengao Di for help with the chlorophyll fluorescence measurement settings.

522

523

524 **CONFLICT OF INTEREST**

525 We have no conflicts of interests to declare.

526

527

528 **AUTHOR CONTRIBUTIONS**

529 T.B.S. and J.M.H. conceived and directed the research; T.B.S., C.F., S.C.Z. and J.M.H.  
530 designed the experiments; T.B.S., K.M. and S.E. performed research and analyzed data;  
531 T.B.S. and J.M.H. wrote the article with input from all the authors.

532

533

534

535

536

537



538 **REFERENCES**

539

540 Benitez-Alfonso Y, Cilia M, San Roman A, Thomas C, Maule A, Hearn S, Jackson D. (2009)  
541 Control of Arabidopsis meristem development by thioredoxin-dependent regulation of  
542 intercellular transport. PNAS 106: 3615–3620

543

544 Botha, CEJ (1992) Plasmodesmatal distribution, structure and frequency in relation to  
545 assimilation in C<sub>3</sub> and C<sub>4</sub> grasses in southern Africa. Planta 187: 348–358.

546

547 Botha CEJ, Hartley BJ, Cross RHM (1993). The Ultrastructure and Computer-enhanced  
548 Digital Image Analysis of Plasmodesmata at the Kranz Mesophyll-Bundle Sheath Interface  
549 of *Themeda triandra* var. *imberbis* (Retz) A. Camus in Conventionally-fixed Leaf Blades.  
550 Annals of Botany, 72(3):255-261.

551

552 Bowes G, Ogren WL and Hageman RH (1971) Phosphoglycolate production catalyzed by  
553 ribulose diphosphate carboxylase. Biochemical and Biophysical Research Communications  
554 45:716–722.

555

556 Bräutigam A, Kajala K, Wullenweber J, Sommer M, Gagneul D, Weber KL, Carr KM, Gowik  
557 U, Mass J, Lercher MJ, Westhoff P, Hibberd JM and Weber AP (2011) An mRNA blueprint  
558 for C<sub>4</sub> photosynthesis derived from comparative transcriptomics of closely related C<sub>3</sub> and C<sub>4</sub>  
559 species. Plant Physiology 155(1):142-56.

560

561 Brown NJ, Parsley K and Hibberd JM (2005) The futured C<sub>4</sub> research– maize, Flaveria or  
562 Cleome? Trends in Plant Science 10:215-221.

563

564 Burch-Smith TM, Brunkard JO, Choi YG, Zambryski PC. (2011) Organelle-nucleus cross-  
565 talk regulates plant intercellular communication via plasmodesmata. Proc. Natl Acad. Sci.  
566 USA 108, E1451-E1460. doi:10.1073/pnas.1117226108

567

568 Burgess SJ, Granero-Moya I, Grangé-Guermente MJ, Bournsnell C, Terry MJ and Hibberd  
569 JM (2016) Ancestral light and chloroplast regulation form the foundations for C<sub>4</sub> gene  
570 expression. Nature Plants 16161(2) DOI: 10.1038/NPLANTS.2016.161

571

- 572 Burgess SJ and Hibberd JM (2015) Insights into C<sub>4</sub> metabolism from comparative deep  
573 sequencing. *Current Opinion of Plant Biology* 25:138-144.  
574
- 575 Cackett L, Luginbühl LH, Schreier TB, Lopez-Juez E and Hibberd JM (2021) Chloroplast  
576 development in green plant tissues: the interplay between light, hormone, and transcriptional  
577 regulation. *New Phytologist* 233(5): 2000-2016.  
578
- 579 Chamovitz D, Pecker I, Hirschberg J. (1991) The molecular basis of resistance to the  
580 herbicide norflurazon. *Plant Mol Biol.* 16(6):967-74. doi: 10.1007/BF00016069. PMID:  
581 1907510.  
582
- 583 Danila FR, Quick WP, White RG, Furbank RT and von Caemmerer S (2016) The metabolite  
584 pathway between bundle sheath and mesophyll: Quantification of plasmodesmata in leaves  
585 of C<sub>3</sub> and C<sub>4</sub> monocots. *Plant Cell* 6:1461-71.  
586
- 587 Danila FR, Quick WP, White RG, White RG, Kelly S, von Caemmerer S and Furbank RT  
588 (2018) Multiple mechanisms for enhanced plasmodesmata density in disparate subtypes of  
589 C<sub>4</sub> grasses. *J Exp Bot* <https://doi.org/10.1093/jxb/erx456>  
590
- 591 Danila FR, Quick WP, White RG, von Caemmerer S and Furbank RT (2019) Response of  
592 plasmodesmata formation in leaves of C<sub>4</sub> grasses to growth irradiance. *Plant, Cell &*  
593 *Environment* 42 (8):2482-2494.  
594
- 595 Deinum EE, Mulder BM, Benitez-Alfonso Y (2019). From plasmodesma geometry to  
596 effective symplasmic permeability through biophysical modelling. *Elife.* 8:e49000.  
597
- 598 Ehlers K, Kollmann R (2001) Primary and secondary plasmodesmata: structure, origin, and  
599 functioning. *Protoplasma* 216:1–30.  
600
- 601 Evert RF, Eschrich W and Heyser W (1977) Distribution and structure of plasmodesmata in  
602 mesophyll and bundle-sheath cells of *Zea-mays-L.* *Planta*, 136:77-89.  
603
- 604 Faulkner C (2018). Plasmodesmata and the symplast, *Current Biology* 28(24):1374-1378.  
605 <https://doi.org/10.1016/j.cub.2018.11.004>  
606

- 607 Faulkner C, Akman OE, Bell K, Jeffree C, Oparka K (2008) Peeking into pit fields: a multiple  
608 twinning model of secondary plasmodesmata formation in tobacco. *Plant Cell*. 20(6):1504-  
609 18. doi: 10.1105/tpc.107.056903.
- 610
- 611 Ganusova EE, Reagan BC, Fernandez JC, Azim MF, Sankoh AF, Freeman KM, McCray  
612 TN, Patterson K, Kim C, Burch-Smith TM. (2020) Chloroplast-to-nucleus retrograde  
613 signalling controls intercellular trafficking via plasmodesmata formation. *Philos Trans R Soc  
614 Lond B Biol Sci*. 375(1801):20190408. doi: 10.1098/rstb.2019.0408.
- 615
- 616 Guseman JM, Lee JS, Bogenschutz NL, Peterson KM, Virata RE, et al. (2010) Dysregulation  
617 of cell-to-cell connectivity and stomatal patterning by loss-of-function mutation in  
618 *Arabidopsis* CHORUS (GLUCAN SYNTHASELIKE 8). *Development* 137: 1731–1741.
- 619
- 620 Hatch MD (1987). C<sub>4</sub> photosynthesis: a unique blend of modified biochemistry, anatomy and  
621 ultrastructure. *Biochim. Biophys. Acta* 895: 81–106.
- 622
- 623 Hatch M D and Osmond CB (1976). In *Transport in Plants III Encyclopedia of Plant  
624 Physiology Vol. 3* (eds Stocking, C. R. & Heber, U.) Ch. 5, 144–184 (Springer, 1976).
- 625
- 626 Hepler PK. (1982) Endoplasmic reticulum in the formation of the cell plate and  
627 plasmodesmata. *Protoplasma* 111:121–133.
- 628
- 629 Hughes A, Faulkner C, Morris RJ and Tomkins M (2021). Intercellular Communication as a  
630 Series of Narrow Escape Problems, *IEEE Transactions on Molecular, Biological and Multi-  
631 Scale Communications*, 7(2):89-93. doi: 10.1109/TMBMC.2021.3083719.
- 632
- 633 Kobayashi K, Otegui MS, Krishnakumar S, Mindrinos M, and Zambryski P (2007)  
634 INCREASED SIZE EXCLUSION LIMIT 2 encodes a putative DEVH box RNA helicase  
635 involved in plasmodesmata function during *Arabidopsis* embryogenesis. *Plant Cell* 19:1885-  
636 1897.
- 637
- 638 Koteyeva NK, Voznesenskaya EV, Roalson EH, Edwards GE (2011) Diversity in forms of  
639 C<sub>4</sub> in the genus *Cleome* (*Cleomaceae*), *Annals of Botany* 107(2):269–283.  
640 <https://doi.org/10.1093/aob/mcq239>
- 641

- 642 Koteyeva NK, Voznesenskaya EV, Cousins AB, Edwards GE (2014) Differentiation of C<sub>4</sub>  
643 photosynthesis along a leaf developmental gradient in two Cleome species having different  
644 forms of Kranz anatomy. J Exp Bot, 65(13):3525–3541. <https://doi.org/10.1093/jxb/eru042>  
645
- 646 Leegood RC (2002) C<sub>4</sub> photosynthesis: principles of CO<sub>2</sub> concentration and prospects for  
647 its introduction into C<sub>3</sub> plants. Journal of Experimental Botany 53 (369):581–590.  
648
- 649 Marshall DM, Muhaidat R, Brown NJ, Liu Z, Stanley S, Griffiths H, Sage RF, Hibberd JM  
650 (2007) Cleome, a genus closely related to Arabidopsis, contains species spanning a  
651 developmental progression from C<sub>3</sub> to C<sub>4</sub> photosynthesis. The Plant Journal 55:886-896.  
652 doi: 10.1111/j.1365-313X.2007.03188.x  
653
- 654 Mulo P, Pursiheimo S, Hou CX, Tyystjärvi T, Aro EM (2003) Multiple effects of antibiotics on  
655 chloroplast and nuclear gene expression. Funct Plant Biol. 30(11):1097-1103. doi:  
656 10.1071/FP03149. PMID: 32689092.  
657
- 658 Newell CA, Brown NJ, Liu Z, Pflug A, Gowik U, Westhoff P, and Hibberd JM (2010)  
659 Agrobacterium tumefaciens-mediated transformation of Cleome gynandra L., a C<sub>4</sub>  
660 dicotyledon that is closely related to Arabidopsis thaliana. J Exp Bot 61(5):1311-1319.  
661
- 662 Nicolas WJ, Grison MS, Trépout S, Gaston A, Fouché M, Cordelières FP, Oparka K, Tilsner  
663 J, Brocard L and Bayer EM (2017) Architecture and permeability of post-cytokinesis  
664 plasmodesmata lacking cytoplasmic sleeves. Nature plants 3:17082.  
665
- 666 Radford JE, Vesik M, Overall RL (1997) Callose deposition at plasmodesmata. Protoplasma  
667 201: 30–37.  
668
- 669 Paterlini A, Belevich I (2022) Serial Block Electron Microscopy to Study Plasmodesmata  
670 in the Vasculature of Arabidopsis thaliana Roots. Yoselin Benitez-Alfonso and Manfred  
671 Heinlein (eds.), Plasmodesmata: Methods and Protocols, Methods in Molecular Biology, vol.  
672 2457, [https://doi.org/10.1007/978-1-0716-2132-5\\_5](https://doi.org/10.1007/978-1-0716-2132-5_5)  
673
- 674 Pipitone R, Eicke S, Pfister B, Glauser G, Falconet D, Uwizeye C, Pralon T, Zeeman SC,  
675 Kessler F, Demarsy E (2021) A multifaceted analysis reveals two distinct phases of  
676 chloroplast biogenesis during de-etiolation in Arabidopsis eLife 10:e62709.

677

678 Reeves G, Singh P, Rossber TA, Sogbohossou D, Schranz E, and Hibberd JM (2018)  
679 Quantitative variation within a species for traits underpinning C<sub>4</sub> photosynthesis. *Plant*  
680 *Physiology*, Volume 177, Issue 2, June 2018, Pages 504–512,  
681 <https://doi.org/10.1104/pp.18.00168>

682

683 Roberts IM, Boevink P, Roberts AG, Sauer N, Reichel C, Oparka KJ. (2001) Dynamic  
684 changes in the frequency and architecture of plasmodesmata during the sink-source  
685 transition in tobacco leaves. *Protoplasma*. 218(1-2):31-44. doi: 10.1007/BF01288358.

686

687 Ross-Elliott T, Jensen KH, Haaning KS, Wager BM, Knoblauch J, Howell AH, Mullendore  
688 DL, Monteith AG, Paultre D, Yan D, Otero S, Bourdon M, Sager R, Lee JY, Helariutta Y,  
689 Knoblauch M, and Oparka KJ (2017) Phloem unloading in *Arabidopsis* roots is convective  
690 and regulated by the phloem-pole pericycle. *eLife* 6:e24125.

691

692 Sage RF, Christin PA and Edwards EJ (2011) The C<sub>4</sub> plant lineages of planet Earth. *J Exp*  
693 *Bot* 62: 3155–3169.

694

695 Shen Z, Li P, Ni RJ, Ritchie M, Yang CP, Liu GF, Ma W, Liu GJ, Ma L, Li SJ, Wei ZG, Wang  
696 HX, Wang BC (2009) Label-free quantitative proteomics analysis of etiolated maize seedling  
697 leaves during greening. *Mol Cell Proteomics*. 8(11):2443-60. doi: 10.1074/mcp.M900187-  
698 MCP200.

699

700 Simpson C, Thomas C, Findlay K, Bayer E, Maule AJ (2009) An *Arabidopsis* GPI-Anchor  
701 Plasmodesmal Neck Protein with Callose Binding Activity and Potential to Regulate Cell-to-  
702 Cell Trafficking. *Plant Cell* 21: 581–594.

703

704 Singh P, Stevenson SR, Reeves G, Schreier TB and Hibberd JM (2021) Induction of C<sub>4</sub>  
705 genes evolved through changes in cis allowing integration into ancestral C<sub>3</sub> gene regulatory  
706 networks. *bioRxiv* <https://doi.org/10.1101/2020.07.03.186395>

707

708 Stonebloom S, Burch-Smith T, Kim I, Meinke D, Mindrinos M, and Zambryski P (2009) Loss  
709 of the plant DEADbox protein ISE1 leads to defective mitochondria and increased cell-to-  
710 cell transport via plasmodesmata. *PNAS* 106(40):17229-17234.

711

712 Stoyanova-Bakalova, E., Karanov, E., Petrov, P. and Hall, M.A. (2004), Cell division and cell  
713 expansion in cotyledons of Arabidopsis seedlings. *New Phytologist*, 162: 471-479.  
714 <https://doi.org/10.1111/j.1469-8137.2004.01031.x>

715

716 Trebst, A. (2007). Inhibitors in the functional dissection of the photosynthetic electron  
717 transport system. *Photosynth Res.* 92, 217–224. doi: 10.1007/s11120-007-9213-x

718

719 Tsukaya H, Tsuge T, Uchimiya T. (1994). The cotyledon: a superior system for studies of  
720 leaf development. *Planta* 195: 309–312.

721

722 Von Caemmerer S. (2021). Updating the steady-state model of C<sub>4</sub> photosynthesis. *J Exp*  
723 *Bot.* 72(17):6003-6017. doi: 10.1093/jxb/erab266.

724

725 Wang P, Khoshravesh R, Karki S, Tapia R, Balahadia CP, Bandyopadhyay A, Quick WP,  
726 Furbank R, Sage TL, Langdale JA. (2017) Re-creation of a Key Step in the Evolutionary  
727 Switch from C<sub>3</sub> to C<sub>4</sub> Leaf Anatomy. *Curr Biol.* 27(21):3278-3287.e6. doi:  
728 10.1016/j.cub.2017.09.040.

729

730 Wang Y, Stutz SS, Bernacchi CJ, Boyd RA, Ort DR, Long SP (2022). Increased bundle-  
731 sheath leakiness of CO<sub>2</sub> during photosynthetic induction shows a lack of coordination  
732 between the C<sub>4</sub> and C<sub>3</sub> cycles. *New Phytologist*. doi: 10.1111/nph.18485.

733

734 Waters MT, Moylan EC, Langdale JA (2008) GLK transcription factors regulate chloroplast  
735 development in a cell-autonomous manner. *The Plant Journal* 56, 432–444. doi:  
736 10.1111/j.1365-313X.2008.03616.x.

737

738

### 739 **SUPPORTING INFORMATION**

740

741 **Supporting Information Videos 1. Compiled video of sequential 50 nm sections of M-**  
742 **BS cell interface in mature leaves of C<sub>4</sub> *G. gynandra*.**

743

744 **Supporting Information Videos 2. Compiled video of sequential 50 nm sections of M-**  
745 **BS cell interface in mature leaves of C<sub>3</sub> *T. hassleriana*.**

746

747 **Supporting Information Videos 3. Compiled video of sequential 50 nm sections of M-**  
748 **BS cell interface in mature leaves of C<sub>3</sub> *A. thaliana*.**

749

750 **Supporting Information Figure 1. Transmission electron micrographs of M-BS, M-M**  
751 **and BS-BS cell interfaces.**

752

753 **Supporting Information Figure 2. Comparison of plasmodesmal frequencies**  
754 **quantified using 2D SEM and 3D SBF-SEM.**

755

756 **Supporting Information Figure 3. Pitfield area is not increased in C<sub>4</sub> *G. gynandra***  
757 **compared to C<sub>3</sub> *A. thaliana* and *T. hassleriana*.**

758

759 **Supporting Information Figure 4. Extended dark treatment for 48 h does not increase**  
760 **plasmodesmata frequency in *G. gynandra* cotyledons.**

761

762 **Supporting Information 5. Chloroplast inhibitors have limited effect on light-induced**  
763 **cotyledon expansion, but affect plasmodesmata formation.**



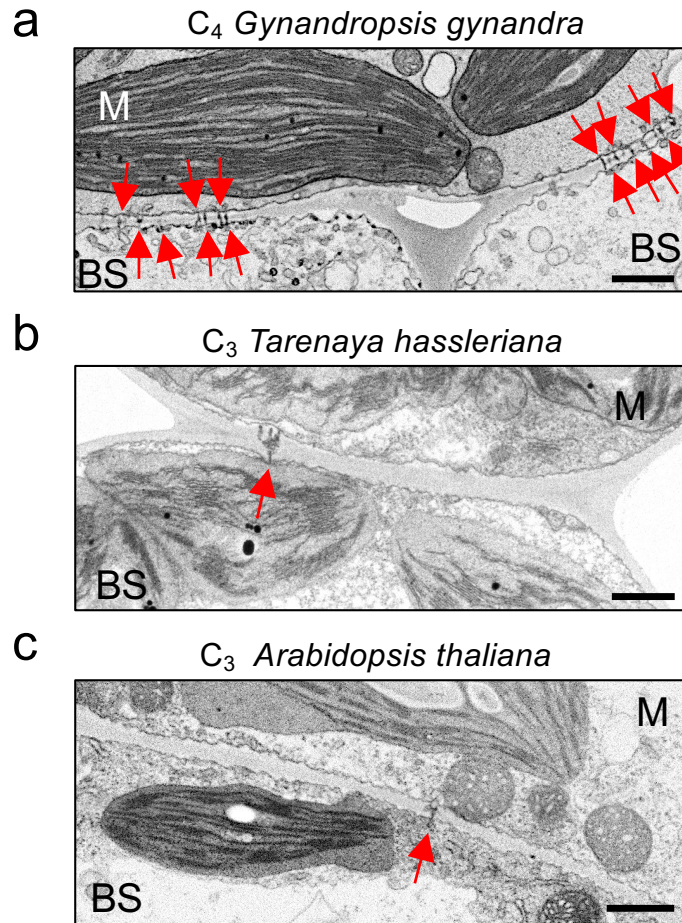

**Figure 1. The M-BS cell interface of *C4 Gynandropsis gynandra* has an increased plasmodesmal connections in comparison to the closely related *C3* species.** Representative transmission electron micrographs of M-BS interfaces in (a) *C4 G. gynandra*, (b) *C3 T. hassleriana* and (c) *C3 A. thaliana* leaves. Mature leaves were harvested from 4-week-old *G. gynandra* and *T. hassleriana*, and from 3-week-old *A. thaliana* plants. Red arrows indicate individual plasmodesma. Scale bar = 1  $\mu\text{m}$

**a**  $C_4$  *Gynandropsis gynandra*

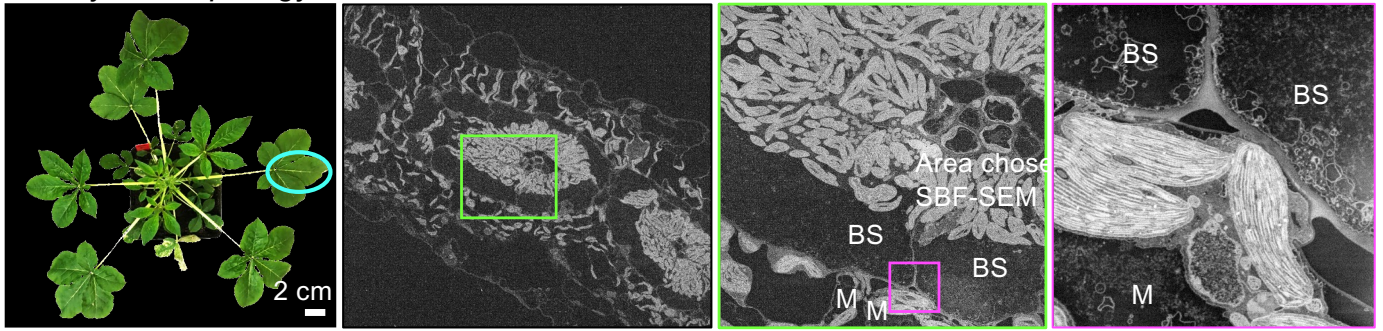

**b**  $C_3$  *Tarenaya hassleriana*

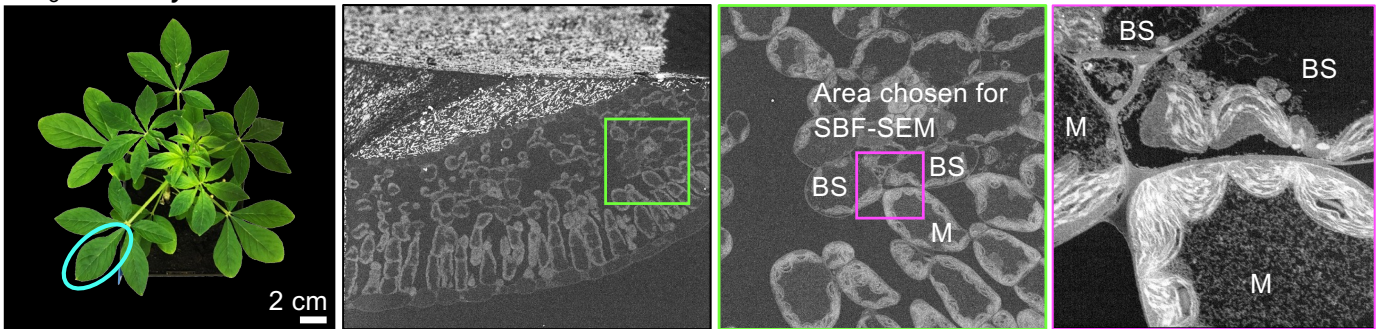

**c**  $C_3$  *Arabidopsis thaliana*

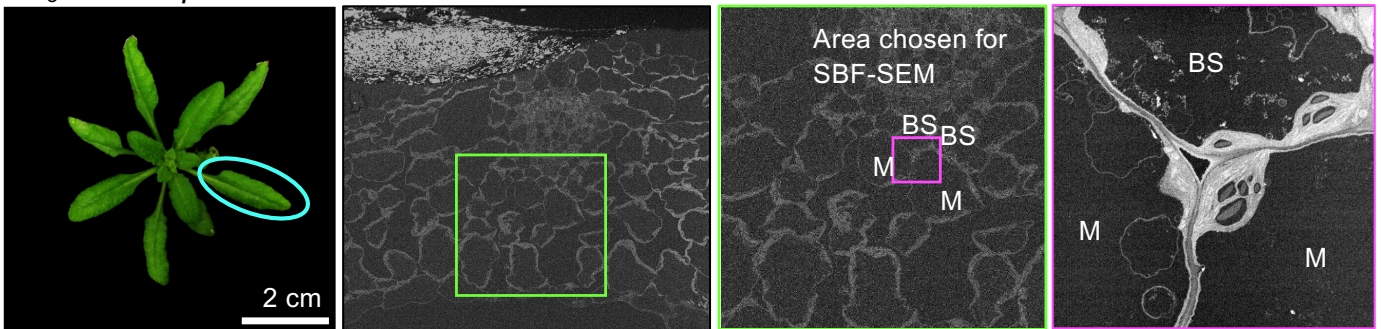

**d**

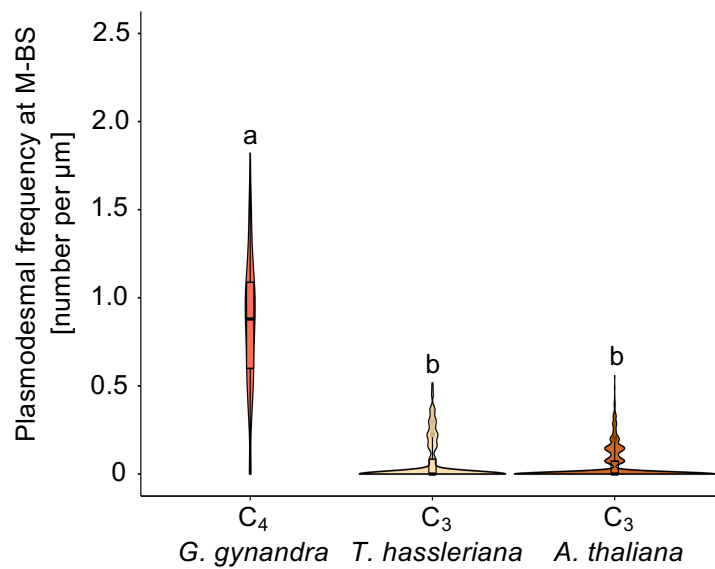

**Figure 2. 3D Serial Block Face-SEM (SBF-SEM) analysis of plasmodesmata number at the M-BS cell interface.** Left panels: Photographs of 4-week-old (a) *C<sub>4</sub> G. gynandra* and (b) *C<sub>3</sub> T. hassleriana*, and 3-week-old (c) *C<sub>3</sub> A. thaliana* plants. Mature leaves harvested for plasmodesmata quantification are circled. Mid left panels: Scanning electron micrographs of leaf cross sections from (a) *C<sub>4</sub> G. gynandra*, (b) *C<sub>3</sub> T. hassleriana* and (c) *C<sub>3</sub> A. thaliana*. Mid right panels: Zoomed image of the region marked by a green box, showing M-BS cell interface area chosen for SBF-SEM analysis (magenta). Left panels: Single frame of compiled SBF-SEM data into Supporting Information Videos 1-3 of (a) *C<sub>4</sub> G. gynandra* (b) *C<sub>3</sub> T. hassleriana* and (c) *C<sub>3</sub> A. thaliana*. (d) Violin plot of plasmodesmal frequencies measured at M-BS cell interfaces in the three plant species using 3D SBF-SEM data. As some sections contained more than one M-BS cell interface, plasmodesmata frequencies were quantified in total of 476 individual M-BS cell interfaces for *G. gynandra*, 367 individual M-BS cell interfaces for *T. hassleriana* and 886 individual M-BS cell interfaces for *A. thaliana*. The box and whiskers represent the 25 to 75 percentile and minimum-maximum distributions of the data. Letters show the statistical ranking using a *post hoc* Tukey test (different letters indicate significant differences at  $P < 0.05$ ). Values indicated by the same letter are not statistically different.



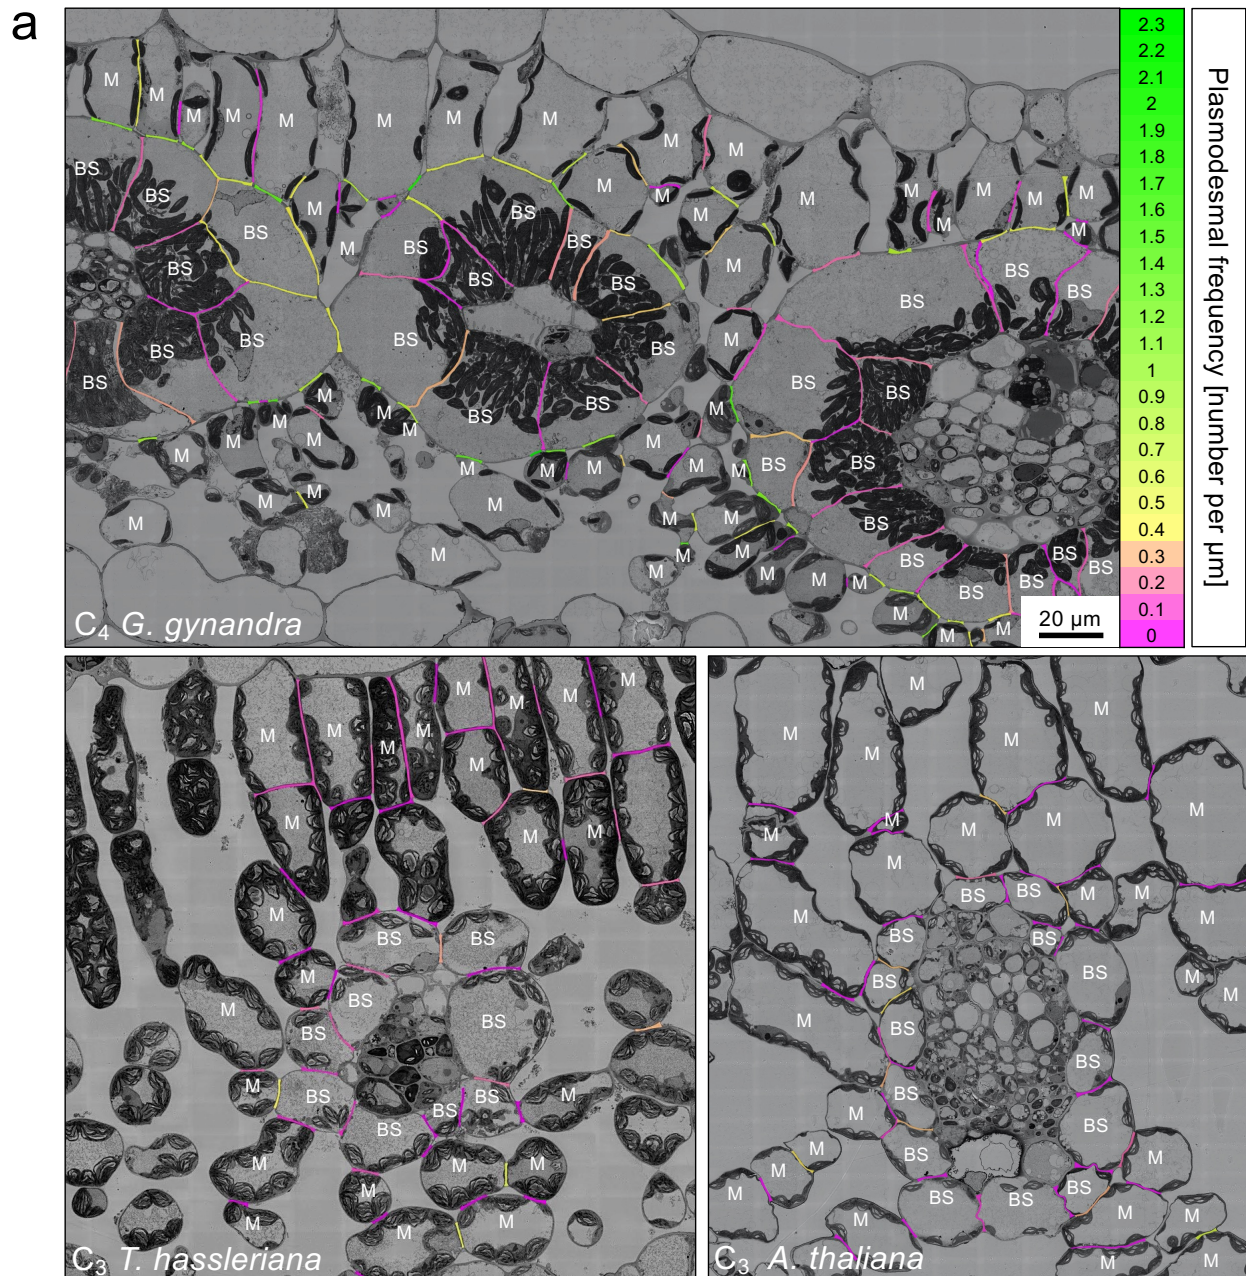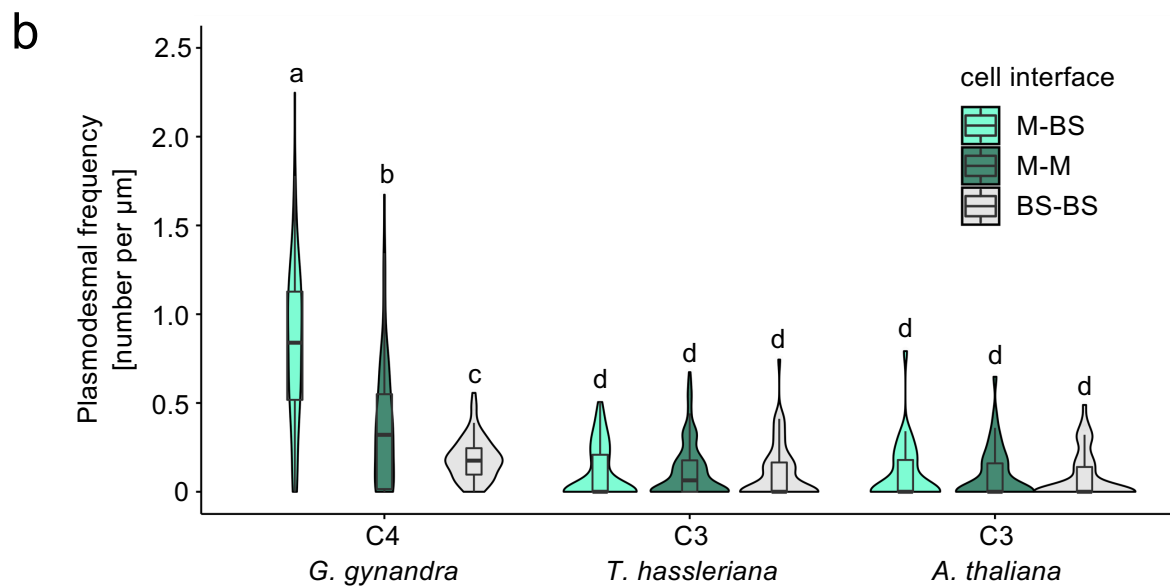

**Figure 3. Plasmodesmata frequency in C4 *G. gynandra* is higher at the M-BS interface compared to other interfaces.** (a) Plasmodesmata distribution heatmap. Cell interfaces in high-resolution 2D SEM maps of C<sub>4</sub> *G. gynandra*, C<sub>3</sub> *T. hassleriana* and C<sub>3</sub> *A. thaliana* leaf cross sections were coloured according to plasmodesmal frequency (number of plasmodesmata observed on the interface, divided by the interface length [ $\mu\text{m}$ ]). (b) Plasmodesmal frequency for M-BS, M-M, and BS-BS interfaces in *G. gynandra*, *T. hassleriana* and *A. thaliana* mature leaves, quantified using high-resolution 2D SEM maps. For *G. gynandra*,  $n = 86$  M-M,  $n = 96$  M-BS and  $n = 70$  BS-BS cell interfaces were quantified. For *T. hassleriana*,  $n = 202$  M-M,  $n = 80$  M-BS and  $n = 77$  BS-BS individual cell interfaces were quantified. For *A. thaliana*,  $n = 45$  M-M,  $n = 37$  M-BS and  $n = 54$  BS-BS cell interfaces were quantified. All interfaces were quantified from leaf samples of at least 3 individual plants (biological replicates) per species. The box and whiskers represent the 25 to 75 percentile and minimum-maximum distributions of the data. Letters show the statistical ranking using a *post hoc* Tukey test (different letters indicate significant differences at  $P < 0.05$ ). Values indicated by the same letter are not statistically different.



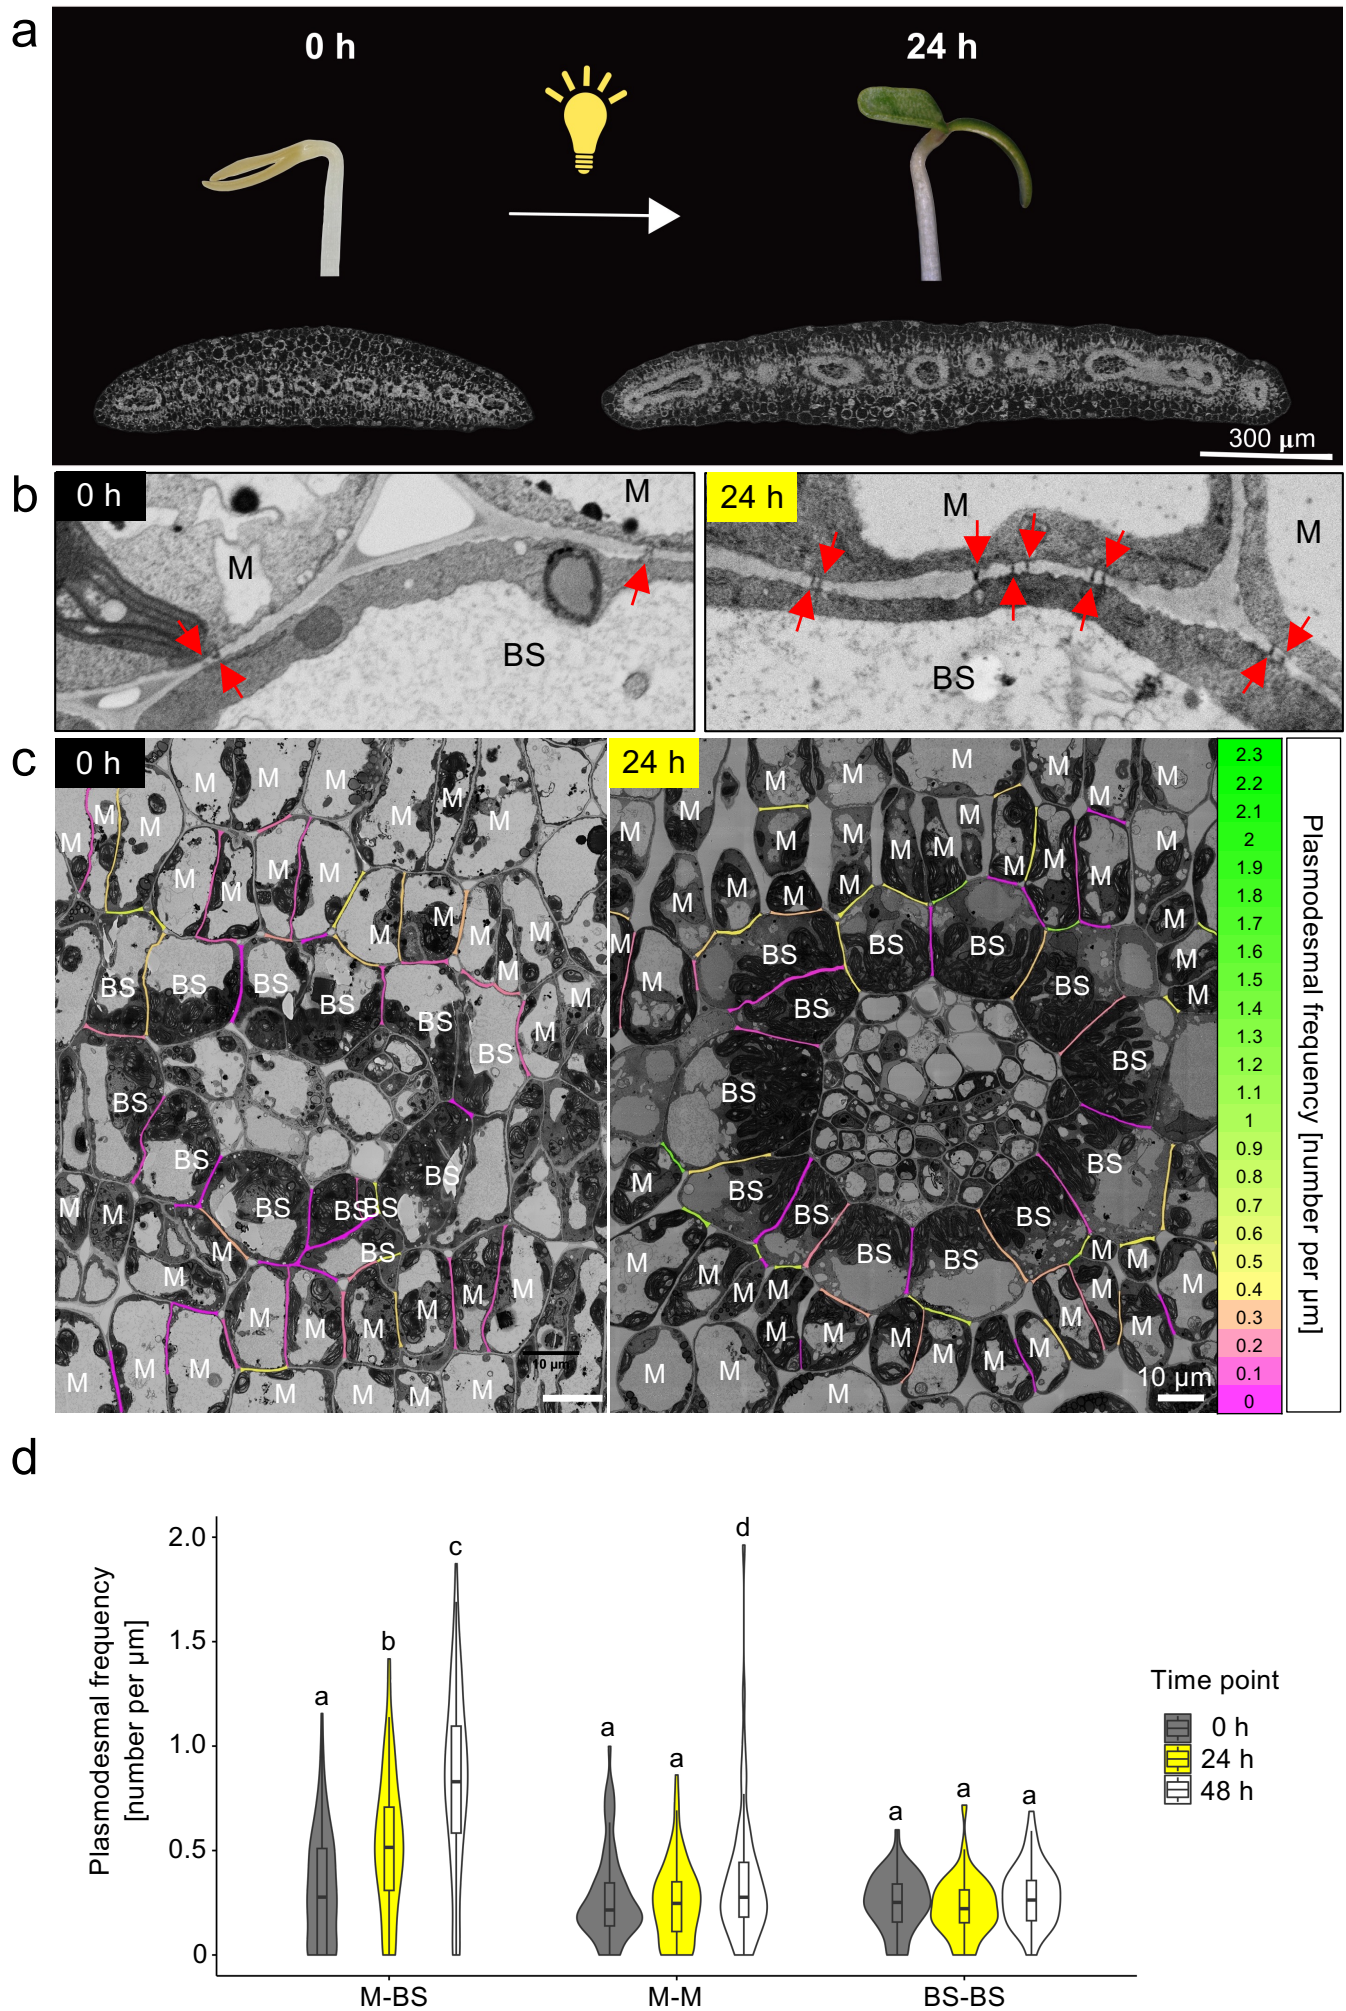

**Figure 4. Light acts as a developmental cue for increased plasmodesmata formation at the M-BS cell interface in *C<sub>4</sub> G. gynandra* cotyledons.** (a) Photographs of representative etiolated (left) and deetiolated (right) *G. gynandra* seedlings and scanning electron micrographs of cotyledon cross sections at 0 h and 24 h time point. (b) Representative scanning electron micrographs of M-BS interfaces in *C<sub>4</sub> G. gynandra* cotyledons. Red arrows indicate individual plasmodesma. Scale bar = 1  $\mu\text{m}$  (c) Plasmodesmata distribution heatmap. Cell interfaces in high-resolution 2D-SEM maps of *C<sub>4</sub> G. gynandra* cotyledon cross sections, harvested prior to light induction (0 h time point) and after light induction (24 h time point) were coloured according to plasmodesmal frequency (number of plasmodesmata observed on the interface, divided by the interface length [ $\mu\text{m}$ ]). (d) Plasmodesmata frequency per  $\mu\text{m}$  cell interfaces (M-BS, M-M, BS-BS) in *G. gynandra* cotyledons was quantified during dark to light transition (0 h, 24 h and 48 h time point) using high resolution 2D SEM maps. For the 0 h time point,  $n = 81$  (M-BS),  $n = 74$  (M-M) and  $n = 49$  (BS-BS) cell interfaces were quantified. For the 24 h time point,  $n = 69$  (M-BS),  $n = 70$  (M-M) and  $n = 42$  (BS-BS) cell interfaces were quantified. For the 48h time point,  $n = 90$  (M-BS),  $n = 60$  (M-M) and  $n = 49$  (BS-BS) cell interfaces were quantified. All interfaces were quantified from cotyledon samples of at least 3 individual seedlings (biological replicates) per time point. The box and whiskers represent the 25 to 75 percentile and minimum-maximum distributions of the data. Letters show the statistical ranking using a one-way ANOVA with a *post hoc* Tukey test (different letters indicate significant differences at  $P < 0.05$ ). Values indicated by the same letter are not statistically different.



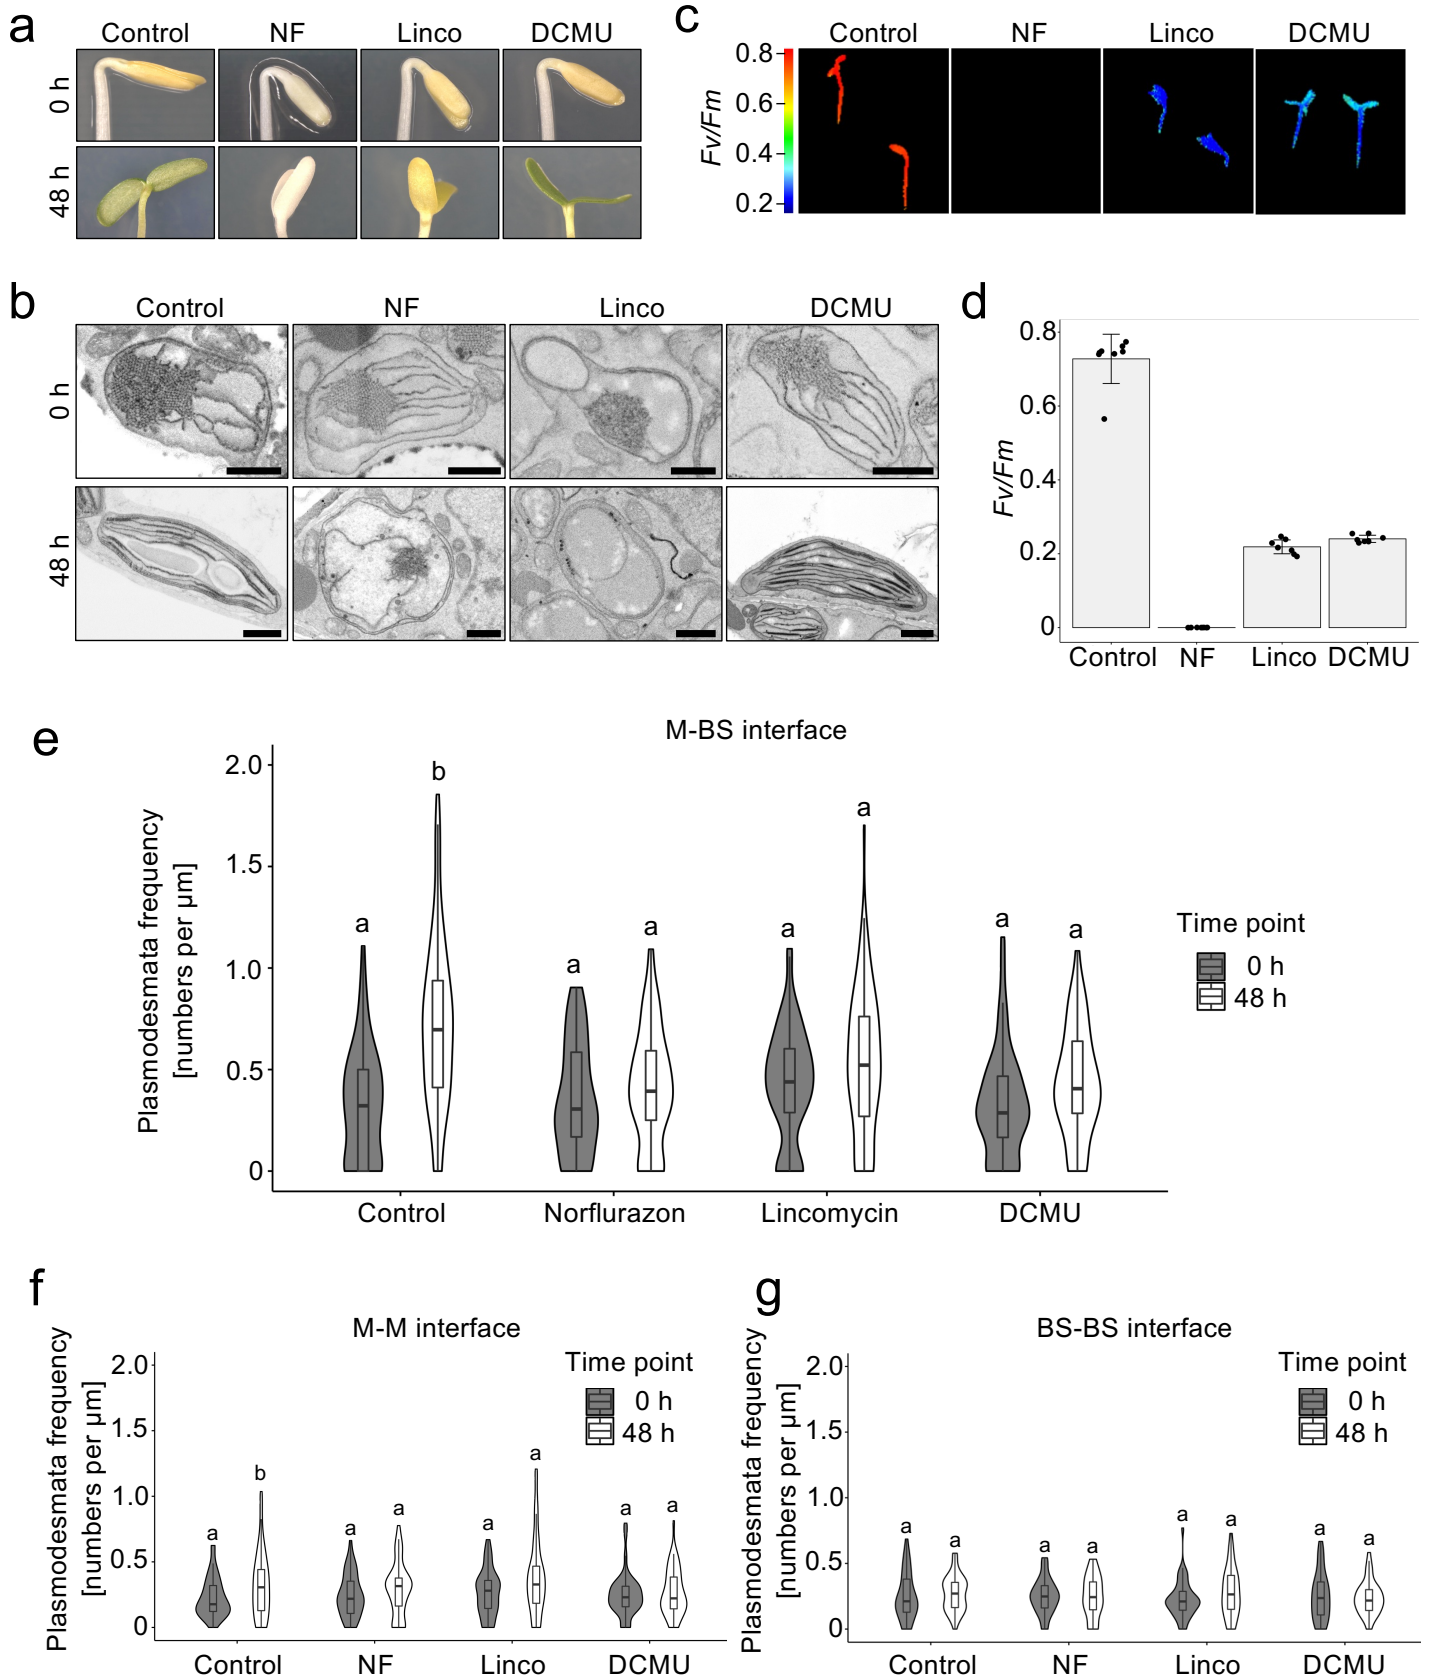

**Figure 5. Chloroplast inhibitors significantly reduced plasmodesmata formation at the M-BS interface.** The effect of norflurazon (NF), lincomycin (Linco), and DCMU were tested. **(a)** Photographs of *G. gynandra* seedlings treated with inhibitors during deetiolation at 0 h and 48 h. **(b)** Scanning electron micrographs of etioplasts (0 h) and mature chloroplasts (48 h) in inhibitor-treated and untreated (Control) *G. gynandra* seedlings. Scale bar = 1  $\mu\text{m}$  **(c)** Chlorophyll fluorescence images of maximum quantum efficiency of PSII photochemistry ( $F_v/F_m$ ) from 48 h deetiolated *G. gynandra* seedlings treated with NF, Linco and DCMU, as well as untreated seedlings (Control). **(d)**  $F_v/F_m$  measured in inhibitor-treated and untreated *G. gynandra* seedlings at 48 h after light induction. Bars represent mean  $\pm$  standard deviation from  $n = 7-8$  individual seedlings, dots represent individual data points. **(e-g)** Plasmodesmata frequency per  $\mu\text{m}$  cell interfaces in *G. gynandra* cotyledons was quantified during dark to light transition (0 h and 48 h time point) for each individual inhibitor treatment using high-resolution 2D SEM maps: **(e)** M-BS, **(f)** M-M and **(g)** BS-BS. **(e)** For M-BS interface: 0h control  $n = 59$ , 0h norflurazon  $n = 53$ , 0h lincomycin  $n = 55$ , 0h DCMU  $n = 50$ , 48h control  $n = 85$ , 48h norflurazon  $n = 66$ , 48h lincomycin  $n = 90$ , 48h DCMU  $n = 50$  cell interfaces were quantified. **(f)** For M-M interface: 0h control  $n = 41$ , 0h norflurazon  $n = 43$ , 0h lincomycin  $n = 45$ , 0h DCMU  $n = 41$ , 48h control  $n = 45$ , 48h norflurazon  $n = 45$ , 48h lincomycin  $n = 45$ , 48h DCMU  $n = 45$  cell interfaces were quantified. **(g)** For BS-BS interface: 0h control  $n = 41$ , 0h norflurazon  $n = 39$ , 0h lincomycin  $n = 44$ , 0h DCMU  $n = 38$ , 48h control  $n = 45$ , 48h norflurazon  $n = 45$ , 48h lincomycin  $n = 43$ , 48h DCMU  $n = 45$  cell interfaces were quantified. All interfaces were quantified from cotyledon samples of at least 3 individual seedlings (biological replicates) per time point. The box and whiskers represent the 25 to 75 percentile and minimum-maximum distributions of the data. Letters show the statistical ranking, pairwise comparison of 0h and 48 h time point for each treatment, using a *post hoc* Tukey test (different letters indicate significant differences at  $P < 0.05$ ). Values indicated by the same letter are not statistically different.

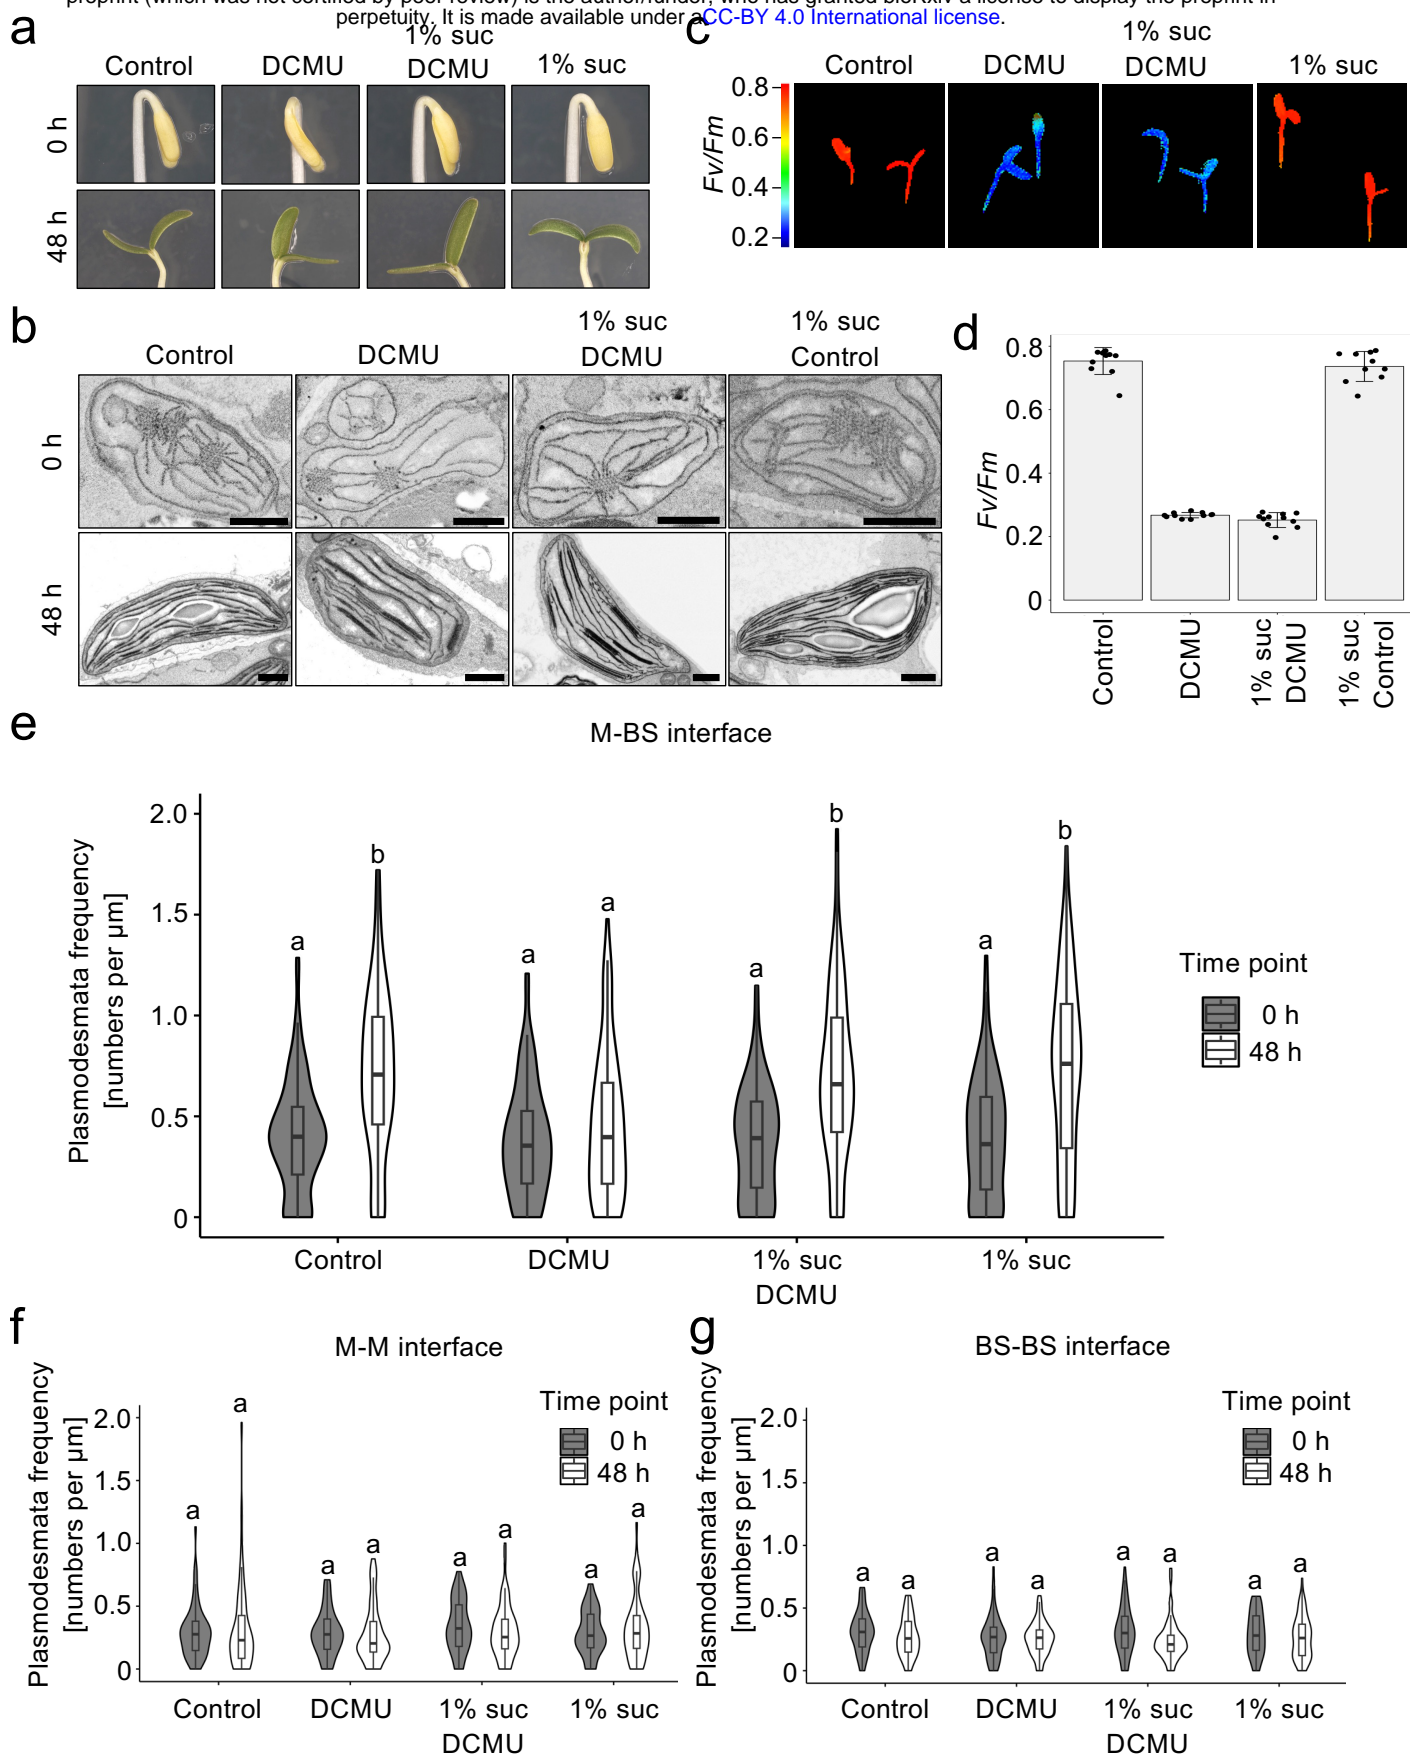

**Figure 6. DCMU-inhibited plasmodesmata formation at the M-BS interface could be rescued by sucrose.** (a) Photographs of DCMU-treated *G. gynandra* seedlings during deetiolation (at 0 h and 48 h) with or without exogenous 1% sucrose. (b) Scanning electron micrographs of etioplasts (0 h) and mature chloroplasts (48 h) of DCMU-treated and untreated (Control) *G. gynandra* seedlings with or without exogenous 1% sucrose. Scale bar = 1  $\mu\text{m}$  (c) Chlorophyll fluorescence images of maximum quantum efficiency of PSII photochemistry ( $F_v/F_m$ ) from 48 h deetiolated *G. gynandra*, untreated and DCMU-treated. (d)  $F_v/F_m$  measured in *G. gynandra* 48 h after light induction. Bars represent mean  $\pm$  standard deviation from  $n = 7-8$  individual seedlings, dots represent individual data points. (e-g) Plasmodesmata frequency per  $\mu\text{m}$  cell interfaces in *G. gynandra* cotyledons was quantified during dark to light transition (0 h and 48 h time point) and DCMU treatment, with and without additional 1% sucrose supply, using high-resolution 2D SEM maps: (e) M-M, (f) M-BS and (g) BS-BS. All interfaces were quantified from cotyledon samples of at least 3 individual seedlings (biological replicates) per time point. (e) For M-BS interface: 0h control\_nosuc  $n = 96$ , 0h DCMU\_nosuc  $n = 82$ , 0h control\_suc  $n = 84$ , 0h DCMU\_suc  $n = 87$ , 48h control\_nosuc  $n = 79$ , 48h DCMU\_nosuc  $n = 98$ , 48h control\_suc  $n = 101$ , 48h DCMU\_suc  $n = 96$  cell interfaces were quantified. (f) For M-M interface: 0h control\_nosuc  $n = 64$ , 0h DCMU\_nosuc  $n = 57$ , 0h control\_suc  $n = 65$ , 0h DCMU\_suc  $n = 63$ , 48h control\_nosuc  $n = 55$ , 48h DCMU\_nosuc  $n = 60$ , 48h control\_suc  $n = 58$ , 48h DCMU\_suc  $n = 55$  cell interfaces were quantified. (g) For BS-BS interface: 0h control\_nosuc  $n = 65$ , 0h DCMU\_nosuc  $n = 62$ , 0h control\_suc  $n = 53$ , 0h DCMU\_suc  $n = 57$ , 48h control\_nosuc  $n = 48$ , 48h DCMU\_nosuc  $n = 53$ , 48h control\_suc  $n = 62$ , 48h DCMU\_suc  $n = 55$  cell interfaces were quantified. The box and whiskers represent the 25 to 75 percentile and minimum-maximum distributions of the data. Letters show the statistical ranking, pairwise comparison of 0h and 48 h time point for each treatment, using a *post hoc* Tukey test (different letters indicate significant differences at  $P < 0.05$ ). Values indicated by the same letter are not statistically different.
