# Supplementary material for: Plasmodesmal connectivity in C4 Gynandropsis gynandra is induced by light and dependent on photosynthesis
Source: bioRxiv or medRxiv preprint supplement (doi:10.1101/2022.12.07.519530), 2022-12-13
Supplement: Supplementary file [file media-4.pdf]

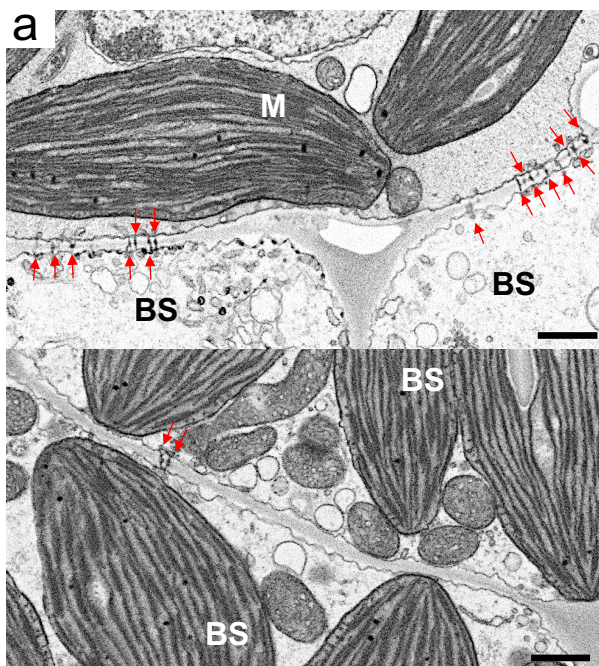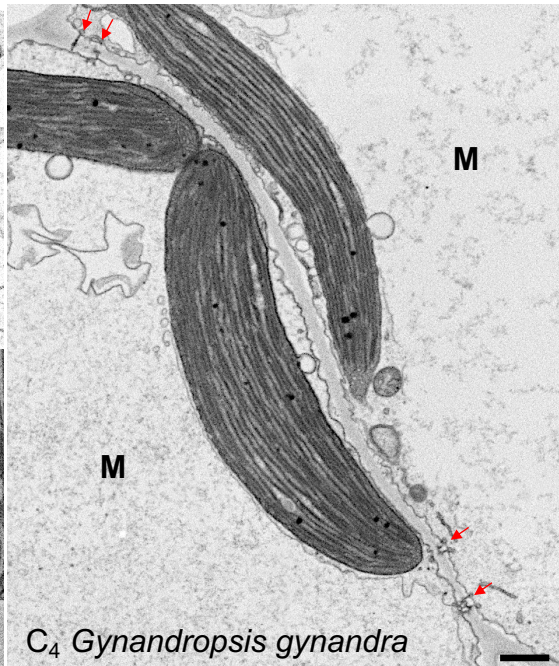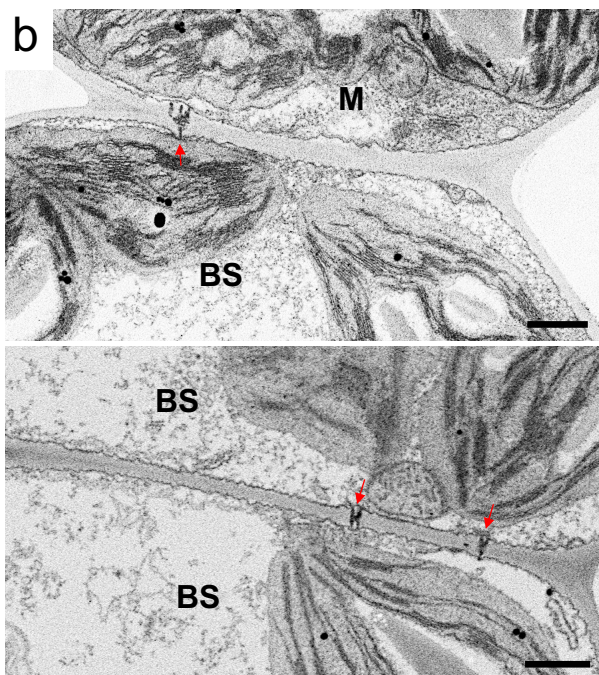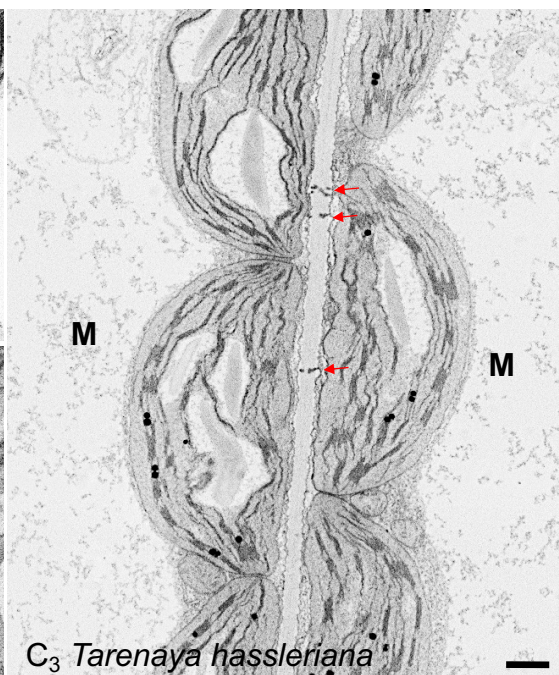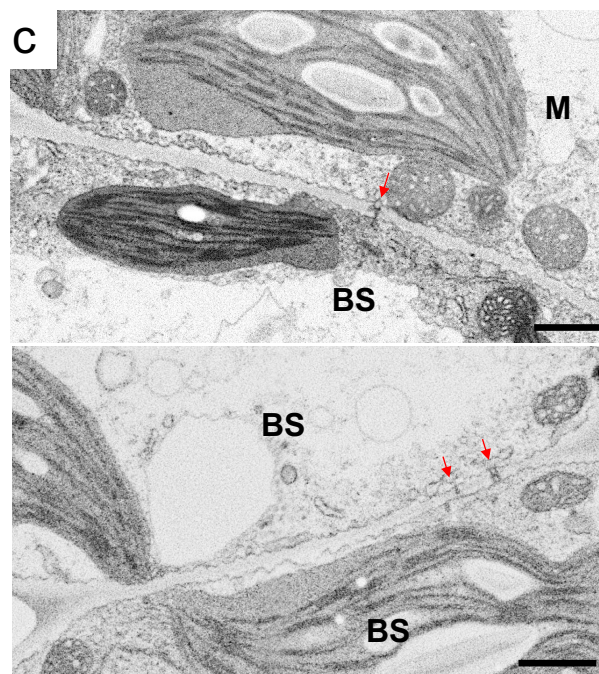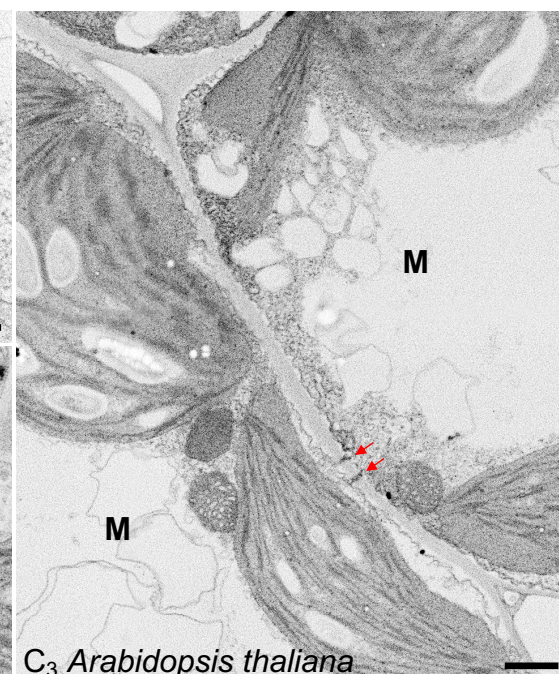

**Supporting Information Figure 1. Transmission electron micrographs of M-BS, M-M and BS-BS cell interfaces.** Representative interfaces in (a) C<sub>4</sub> *G. gynandra*, (b) C<sub>3</sub> *T. hassleriana* and (c) C<sub>3</sub> *A. thaliana* leaves. Mature leaves were harvested from 4-week-old *G. gynandra* and *T. hassleriana* plants and 3-week-old *A. thaliana*. Red arrows indicate individual plasmodesma. Scale bar = 1 μm

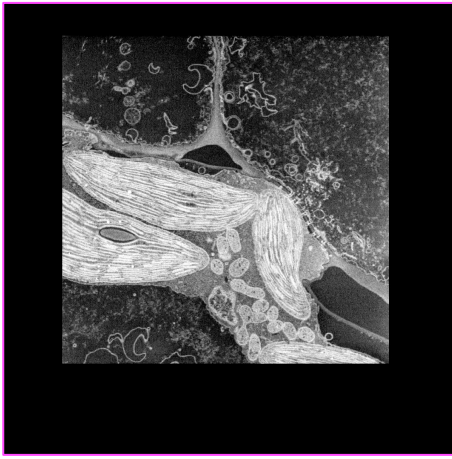

**Supporting Information Videos 1. Compiled video of sequential 50 nm sections of M-BS cell interface in mature leaves of C<sub>4</sub> *G. gynandra*.**  $n = 281$  sequential sections;  $N = 467$  individual plasmodesmal frequencies measured (some sections contained more than one M-BS interface). Video shows BS cells on top and M cells on bottom.

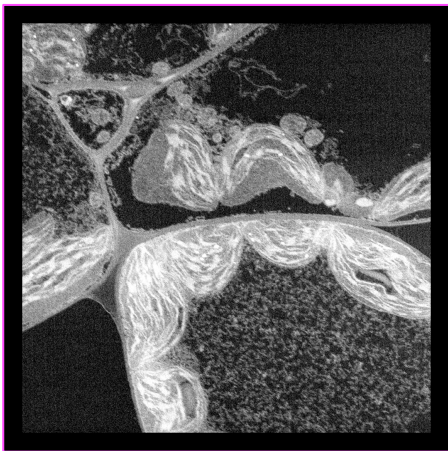

**Supporting Information Videos 2. Compiled video of sequential 50 nm sections of M-BS cell interface in mature leaves of C<sub>3</sub> *T. hassleriana*.**  $n = 367$  sequential sections;  $N = 367$  individual plasmodesmal frequencies measured. Video shows BS cells on top and M cells on bottom.

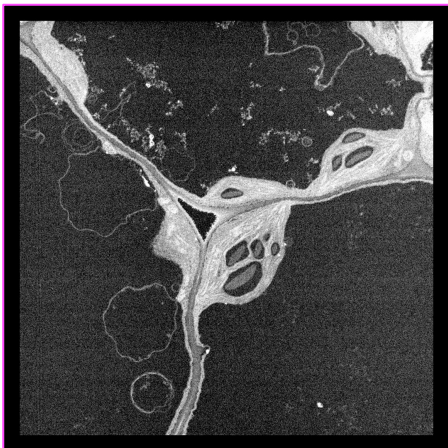

**Supporting Information Videos 3. Compiled video of sequential 50 nm sections of M-BS cell interface in mature leaves of C<sub>3</sub> *A. thaliana*.**  $n = 438$  sequential sections;  $N = 886$  individual plasmodesmal frequencies measured. Video shows BS cells on top and M cells on bottom.

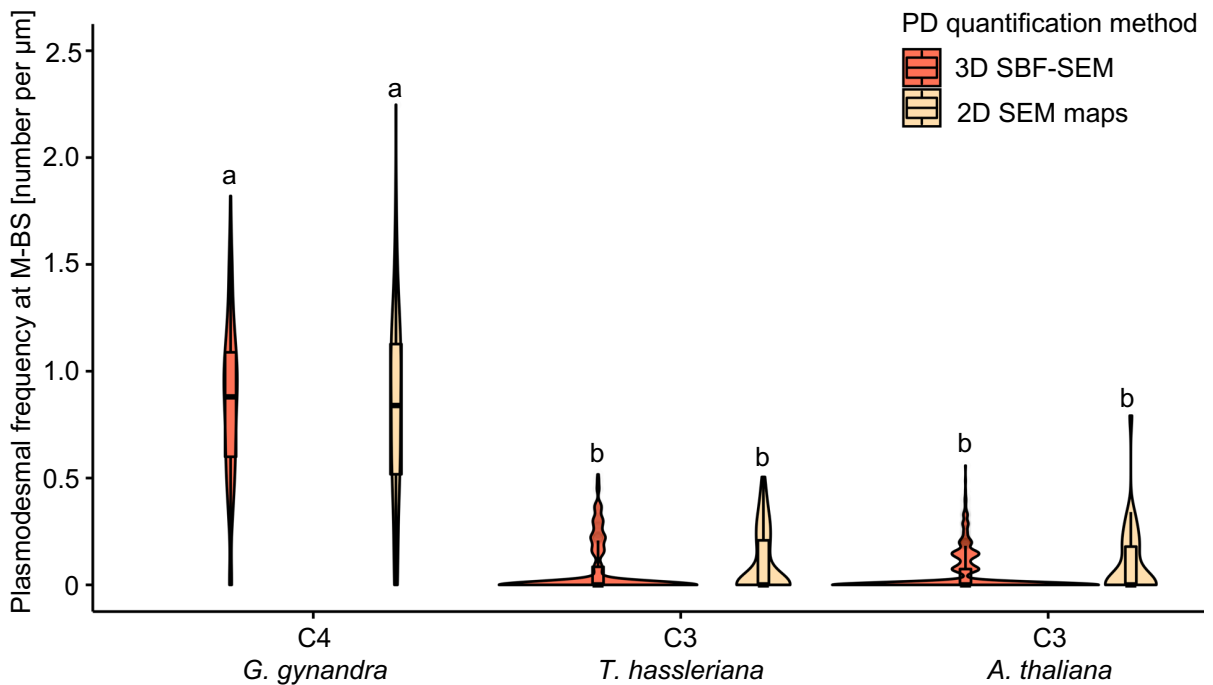

**Supporting Information Figure 2. Comparison of plasmodesmal frequencies quantified using 2D SEM and 3D SBF-SEM.** Numerous M-BS cell interfaces were quantified in 2D SEM maps, while few M-BS cell interfaces were analysed in-depth using 3D SBF-SEM. The box and whiskers represent the 25 to 75 percentile and minimum-maximum distributions of the data. Letters show the statistical ranking using a *post hoc* Tukey test (different letters indicate significant differences at  $P < 0.05$ ). Values indicated by the same letter are not statistically different.

a

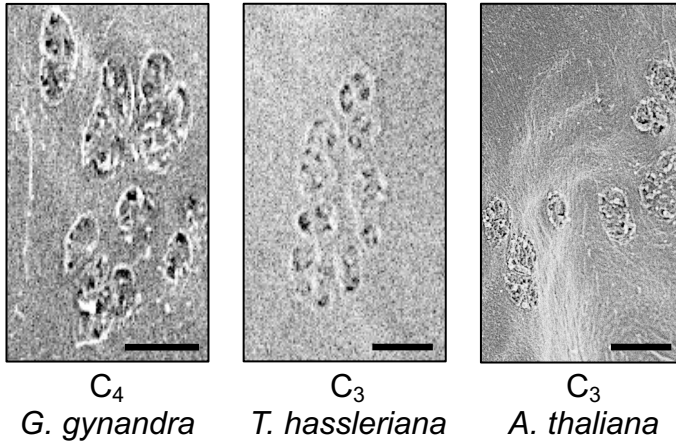

b

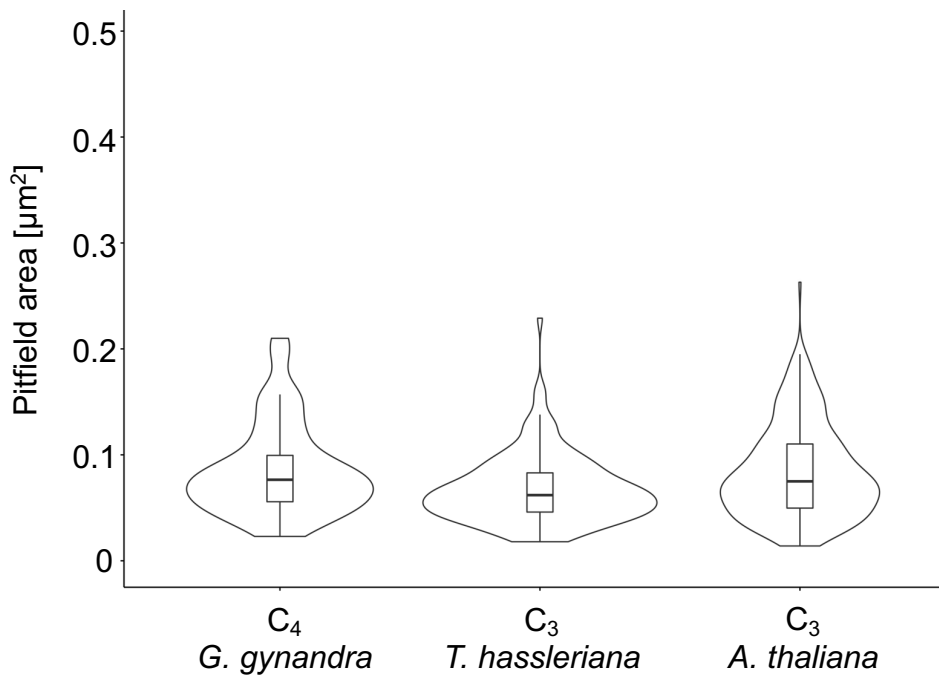

**Supporting Information Figure 3. Pitfield area is not increased in  $C_4$  *G. gynandra* compared to  $C_3$  *A. thaliana* and *T. hassleriana*.** (a) Representative scanning electron micrographs of plasmodesmata pitfields at M-BS cell interface in each species. Scale bars =  $0.5 \mu\text{m}$  (b) Measured pitfield areas of *G. gynandra* ( $n = 260$ ), *T. hassleriana* ( $n = 151$ ) and *A. thaliana* ( $n = 40$ ).

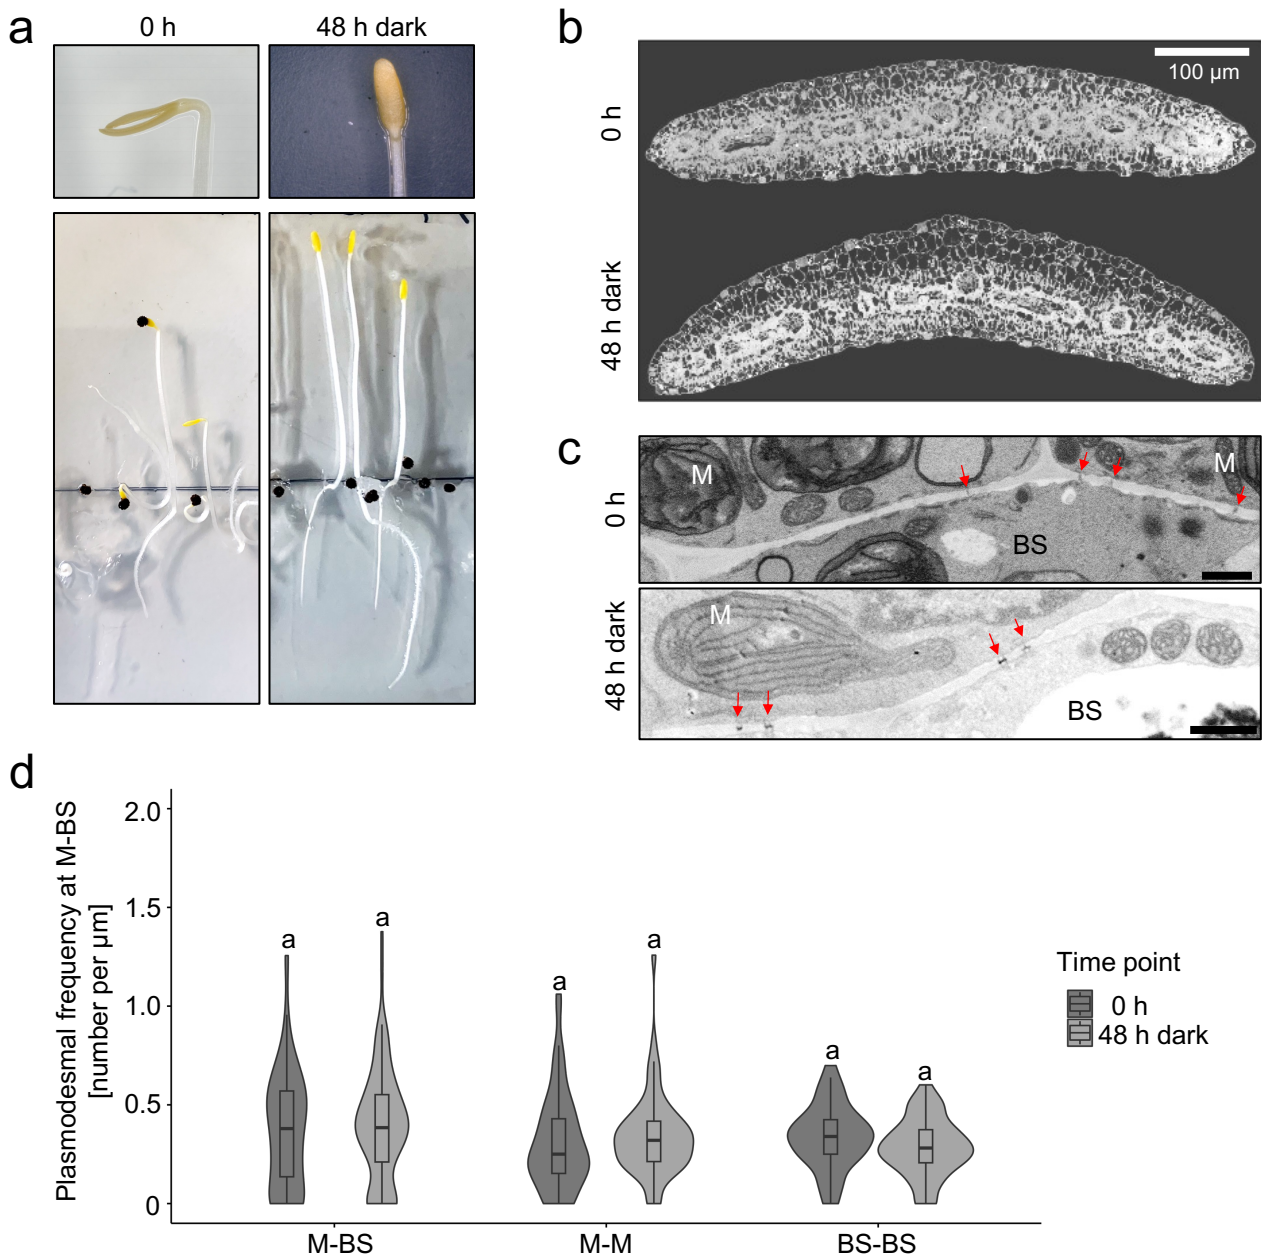

**Supporting Information 4. Extended dark treatment for 48 h does not increase plasmodesmata frequency in *G. gynandra* cotyledons.** (a) Photographs of 3-day-old (0) and 5-day-old (48 h extended dark) dark-grown *G. gynandra* seedlings on half-strength MS media. (b) Scanning electron micrographs of entire cotyledon cross sections of 0 h and 48 h extended dark-treated *G. gynandra* seedlings. (c)

Representative scanning electron micrographs of M-BS interfaces of 0 h and 48 h extended dark-treated *G. gynandra* cotyledons. Red arrows indicate individual plasmodesmata. Scale bar = 1  $\mu\text{m}$  (d) Plasmodesmal frequency per  $\mu\text{m}$  cell interfaces (for M-BS, M-M and BS-BS) in *G. gynandra* cotyledons was quantified before and after extended dark treatment (0 h and 48 h dark time point) using high-resolution 2D SEM maps. For the 0 h time point,  $n = 84$  (M-BS),  $n = 60$  (M-M), and  $n = 41$  (BS-BS) cell interfaces were quantified. For the 48h dark time point,  $n = 91$  (M-BS),  $n = 60$  (M-M), and  $n = 58$  (BS-BS) cell interfaces were quantified. All interfaces were quantified from cotyledon samples of at least 3 individual seedlings (biological replicates) per time point. The box and whiskers represent the 25 to 75 percentile and minimum-maximum distributions of the data. Letters show the statistical ranking using a *post hoc* Tukey test (different letters indicate significant differences at  $P < 0.05$ ). Values indicated by the same letter are not statistically different.

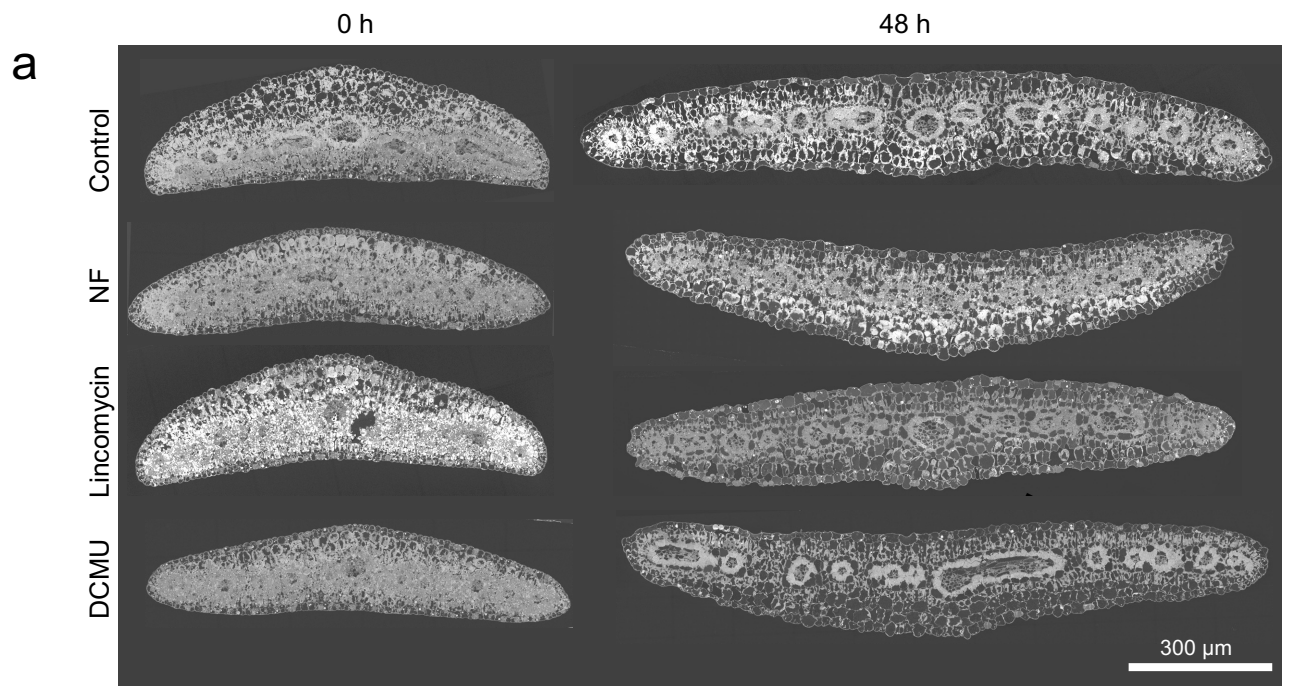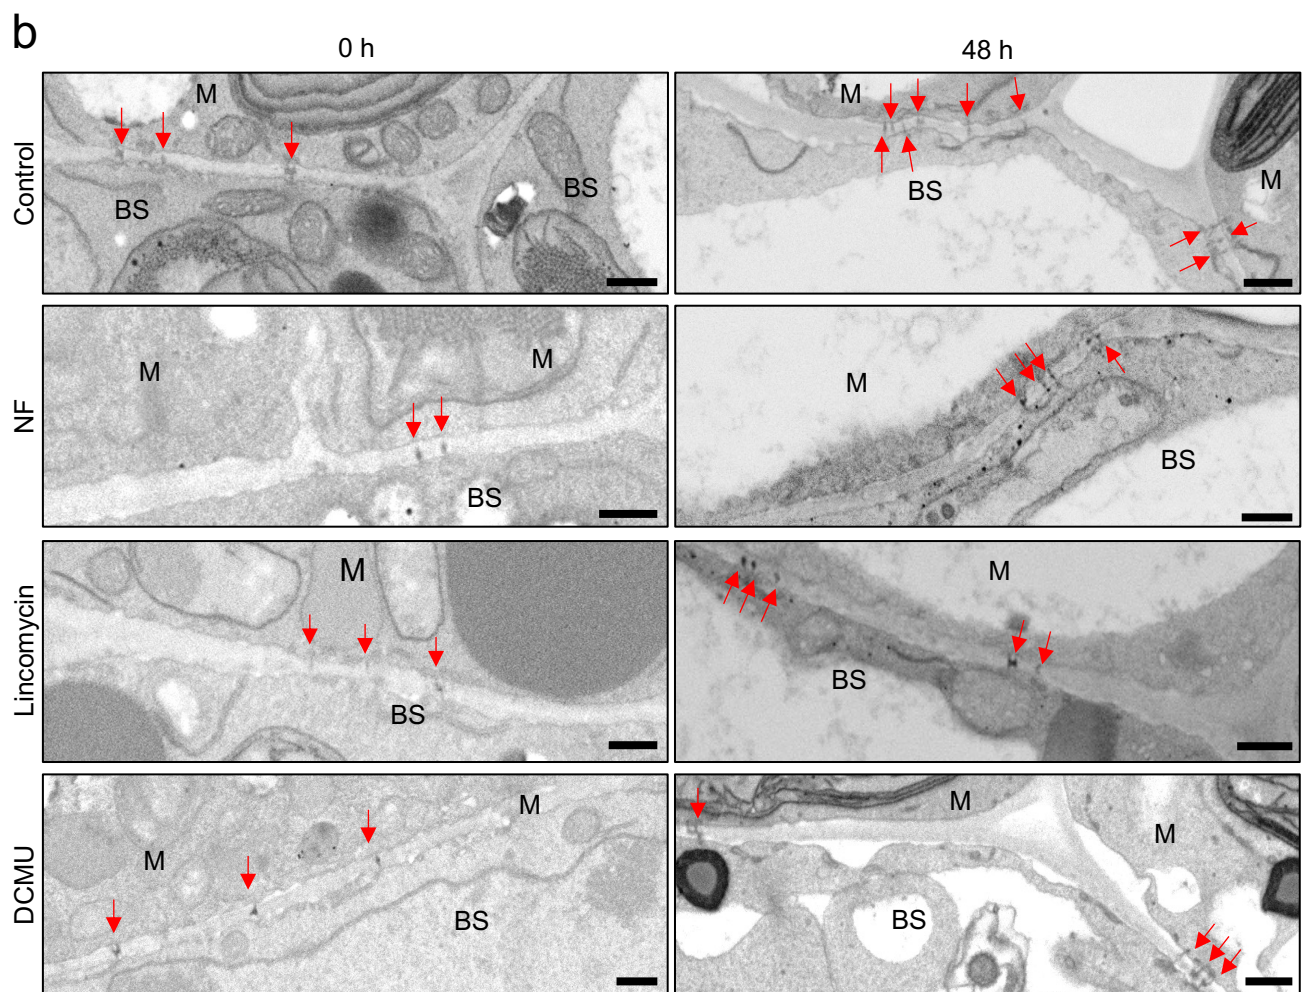

**Supporting Information 5. Chloroplast inhibitors have limited effect on light-induced cotyledon expansion, but affect plasmodesmata formation.** The effect of norflurazon (NF), lincomycin (Linco) and DCMU were tested. **(a)** Scanning electron micrographs of entire cotyledon cross sections of *G. gynandra* seedlings, 0 h and 48 h after light induction. **(b)** Representative scanning electron micrographs of M-BS interfaces of 0 h and 48 h during de-etiolation of *G. gynandra* cotyledons treated with NF, Linco and DCMU, as well as untreated seedlings (Control). Red arrows indicate individual plasmodesma. Scale bar = 1  $\mu$ m
